# Supplementary material for: Propensity score adjustment using machine learning classification algorithms to control selection bias in online surveys
Source: PubMed Central journal article supplement (PMC7176094; doi:10.1371/journal.pone.0231500), 2020-04-22
Supplement: pone.0231500.s001.pdf [file pone.0231500.s001.pdf]

S1 Table. Summary statistics of the simulated population and the subpopulations with and without Internet access.

| Variable    | Stats / Values | Full population<br>(N = 50,000) | Internet population<br>(N = 31,881) | No Internet population<br>(N = 18,119) |
|-------------|----------------|---------------------------------|-------------------------------------|----------------------------------------|
| Vote        | Party 1        | 10.2%                           | 10.0%                               | 10.6%                                  |
|             | Party 2        | 36.7%                           | 33.8%                               | 41.7%                                  |
|             | Party 3        | 29.9%                           | 41.3%                               | 9.8%                                   |
| Education   | Primary        | 50.6%                           | 48.3%                               | 54.6%                                  |
|             | Secondary      | 21.1%                           | 21.5%                               | 20.4%                                  |
|             | Tertiary       | 28.3%                           | 30.2%                               | 25.1%                                  |
| Age         | Mean (s. d.)   | 50.8 (16.5)                     | 48.5 (16.1)                         | 54.8 (16.4)                            |
|             | Median         | 50                              | 47                                  | 54                                     |
| Gender      | Man            | 50.2%                           | 50.6%                               | 49.7%                                  |
|             | Woman          | 49.8%                           | 49.4%                               | 50.3%                                  |
| Nationality | Native         | 90.9%                           | 98.2%                               | 77.9%                                  |
|             | Non-native     | 9.1%                            | 1.8%                                | 22.1%                                  |
