# Supplementary material for: Propensity score adjustment using machine learning classification algorithms to control selection bias in online surveys
Source: PubMed Central journal article supplement (PMC7176094; doi:10.1371/journal.pone.0231500), 2020-04-22
Supplement: pone.0231500.s002.pdf [file pone.0231500.s002.pdf]

S2 Table. Optimal parameters for each algorithm given a volunteer sample size and a group of covariates in the real data simulation, obtained with a 10 times repeated 10-fold cross-validation

| $n_{vs}$ | Cov.       | KNN<br>k | C5.0     |                        |                                 | CART<br>CP | % sample |
|----------|------------|----------|----------|------------------------|---------------------------------|------------|----------|
|          |            |          | Trials   | Model                  | Winnow                          |            |          |
| 500      | G1         | 11       | 1        | tree                   | TRUE                            | 0.1        | 0.5%     |
| 500      | G2         | 11       | 1        | tree                   | TRUE                            | 0.1        | 0.5%     |
| 500      | G3         | 11       | 1        | tree                   | FALSE                           | 0.1        | 0.5%     |
| 500      | G4         | 11       | 1        | tree                   | TRUE                            | 0.1        | 0.5%     |
| 750      | G1         | 11       | 1        | tree                   | TRUE                            | 0.1        | 0.5%     |
| 750      | G2         | 11       | 1        | tree                   | TRUE                            | 0.5        | 0.5%     |
| 750      | G3         | 11       | 1        | tree                   | FALSE                           | 0.25       | 1%       |
| 750      | G4         | 11       | 1        | tree                   | TRUE                            | 0.1        | 5%       |
| 1000     | G1         | 11       | 1        | tree                   | TRUE                            | 0.5        | 0.5%     |
| 1000     | G2         | 11       | 1        | tree                   | FALSE                           | 0.25       | 5%       |
| 1000     | G3         | 11       | 1        | tree                   | FALSE                           | 0.5        | 5%       |
| 1000     | G4         | 11       | 1        | tree                   | TRUE                            | 0.25       | 5%       |
| 2000     | G1         | 11       | 1        | tree                   | TRUE                            | 0.25       | 1%       |
| 2000     | G2         | 11       | 1        | tree                   | TRUE                            | 0.25       | 1%       |
| 2000     | G3         | 11       | 1        | tree                   | FALSE                           | 0.5        | 0.5%     |
| 2000     | G4         | 11       | 1        | tree                   | TRUE                            | 0.5        | 0.5%     |
| 5000     | G1         | 11       | 1        | tree                   | TRUE                            | 0.1        | 1%       |
| 5000     | G2         | 11       | 1        | tree                   | TRUE                            | 0.1        | 1%       |
| 5000     | G3         | 11       | 1        | tree                   | FALSE                           | 0.25       | 1%       |
| 5000     | G4         | 11       | 1        | tree                   | TRUE                            | 0.5        | 0.5%     |
| $n_{vs}$ | Cov. group | C4.5     |          | Naive Bayes<br>Laplace | Random Forest<br>Vars. in trees | GBM        |          |
|          |            | CP       | % sample |                        |                                 | ID         | LR       |
| 500      | G1         | 0.1      | 0.5%     | 0                      | $p$                             | 8          | 0.01     |
| 500      | G2         | 0.1      | 1%       | 0                      | $p$                             | 8          | 0.01     |
| 500      | G3         | 0.1      | 1%       | 0                      | $\sqrt{p}$                      | 8          | 0.01     |
| 500      | G4         | 0.1      | 1%       | 0                      | $p/2$                           | 8          | 0.01     |
| 750      | G1         | 0.1      | 0.5%     | 0                      | $p$                             | 8          | 0.01     |
| 750      | G2         | 0.5      | 1%       | 0                      | $p$                             | 8          | 0.01     |
| 750      | G3         | 0.5      | 5%       | 0                      | $p/2$                           | 4          | 0.1      |
| 750      | G4         | 0.5      | 5%       | 0                      | $p/2$                           | 8          | 0.01     |
| 1000     | G1         | 0.5      | 0.5%     | 0                      | $p$                             | 6          | 0.01     |
| 1000     | G2         | 0.5      | 0.5%     | 0                      | $p$                             | 6          | 0.01     |
| 1000     | G3         | 0.25     | 1%       | 0                      | $p/2$                           | 4          | 0.1      |
| 1000     | G4         | 0.1      | 1%       | 0                      | $\sqrt{p}$                      | 8          | 0.01     |
| 2000     | G1         | 0.1      | 0.5%     | 0                      | $p$                             | 6          | 0.01     |
| 2000     | G2         | 0.1      | 0.5%     | 0                      | $p$                             | 4          | 0.01     |
| 2000     | G3         | 0.5      | 1%       | 0                      | $p/2$                           | 8          | 0.01     |
| 2000     | G4         | 0.5      | 1%       | 0                      | $\sqrt{p}$                      | 8          | 0.01     |
| 5000     | G1         | 0.1      | 0.5%     | 0                      | $p$                             | 8          | 0.01     |
| 5000     | G2         | 0.1      | 0.5%     | 0                      | $p$                             | 4          | 0.01     |
| 5000     | G3         | 0.5      | 0.5%     | 0                      | $p/2$                           | 4          | 0.1      |
| 5000     | G4         | 0.5      | 0.5%     | 0                      | $\sqrt{p}$                      | 4          | 0.1      |
