# Supplementary material for: Propensity score adjustment using machine learning classification algorithms to control selection bias in online surveys
Source: PubMed Central journal article supplement (PMC7176094; doi:10.1371/journal.pone.0231500), 2020-04-22
Supplement: pone.0231500.s003.pdf [file pone.0231500.s003.pdf]

S3 Table. Bias on the estimation of vote intention with unequal selection probabilities for the convenience sample based on SRSWOR from the Internet population

| Method              |         | Parameters |      | Convenience (Internet) sample sizes, in thousands of respondents |      |      |      |      |                       |      |      |      |      |                       |      |      |      |      |      |      |      |      |      |
|---------------------|---------|------------|------|------------------------------------------------------------------|------|------|------|------|-----------------------|------|------|------|------|-----------------------|------|------|------|------|------|------|------|------|------|
|                     |         |            |      | Estimates for Party 1                                            |      |      |      |      | Estimates for Party 2 |      |      |      |      | Estimates for Party 3 |      |      |      |      |      |      |      |      |      |
|                     |         | 0.5        | 0.75 | 1                                                                | 2    | 5    | 7.5  | 10   | 0.5                   | 0.75 | 1    | 2    | 5    | 7.5                   | 10   | 0.5  | 0.75 | 1    | 2    | 5    | 7.5  | 10   |      |
| No adjustment       |         | -0.2       | -0.1 | -0.2                                                             | -0.2 | -0.2 | -0.2 | -0.2 | -2.7                  | -2.9 | -2.7 | -2.8 | -2.9 | -2.8                  | -2.9 | 11.3 | 11.4 | 11.4 | 11.4 | 11.4 | 11.4 | 11.4 |      |
| Logistic regression |         | -0.1       | -0.1 | -0.2                                                             | -0.2 | -0.1 | -0.1 | -0.1 | -0.6                  | -0.7 | -0.6 | -0.7 | -0.7 | -0.7                  | -0.7 | 9.8  | 9.9  | 9.9  | 9.9  | 9.8  | 9.9  | 9.9  |      |
| C4.5                | M       | CP         | -0.3 | -0.1                                                             | -0.2 | -0.2 | -0.2 | -0.2 | -1.6                  | -3.3 | -3.4 | -3.3 | -2.9 | -2.9                  | -2.9 | 10.5 | 11.6 | 11.7 | 11.6 | 11.4 | 11.4 | 11.4 |      |
|                     | 0.005   | 0.1        | -0.2 | -0.1                                                             | -0.1 | -0.2 | -0.2 | -0.2 | -1.8                  | -3.0 | -3.3 | -3.3 | -2.9 | -2.9                  | -2.9 | 10.6 | 11.2 | 11.6 | 11.8 | 11.5 | 11.4 | 11.4 |      |
|                     | 0.005   | 0.25       | 0.0  | -0.1                                                             | -0.2 | -0.1 | -0.2 | -0.2 | -1.5                  | -2.0 | -2.3 | -3.2 | -3.0 | -2.9                  | -2.9 | 10.3 | 10.8 | 11.0 | 11.6 | 11.5 | 11.4 | 11.4 |      |
|                     | 0.005   | 0.5        | -0.1 | -0.1                                                             | -0.2 | -0.2 | -0.2 | -0.2 | -1.8                  | -3.3 | -3.4 | -3.3 | -2.9 | -2.8                  | -2.8 | 10.5 | 11.5 | 11.7 | 11.7 | 11.4 | 11.4 | 11.4 |      |
|                     | 0.01    | 0.1        | -0.1 | -0.2                                                             | -0.2 | -0.1 | -0.2 | -0.2 | -1.7                  | -2.9 | -3.3 | -3.3 | -2.9 | -2.9                  | -2.9 | 10.6 | 11.4 | 11.7 | 11.8 | 11.4 | 11.4 | 11.4 |      |
|                     | 0.01    | 0.25       | -0.2 | -0.2                                                             | -0.2 | -0.2 | -0.2 | -0.2 | -1.3                  | -2.1 | -2.5 | -3.3 | -2.9 | -2.9                  | -2.9 | 10.2 | 10.7 | 11.2 | 11.6 | 11.5 | 11.4 | 11.4 |      |
|                     | 0.01    | 0.5        | -0.2 | -0.1                                                             | -0.2 | -0.2 | -0.2 | -0.2 | -1.8                  | -3.5 | -3.6 | -2.9 | -2.9 | -2.8                  | -2.9 | 10.4 | 11.7 | 11.8 | 11.4 | 11.4 | 11.4 | 11.4 |      |
|                     | 0.05    | 0.1        | 0.0  | -0.1                                                             | -0.1 | -0.2 | -0.2 | -0.2 | -1.7                  | -3.0 | -3.6 | -2.9 | -2.9 | -2.9                  | -2.9 | 10.4 | 11.3 | 11.7 | 11.4 | 11.4 | 11.5 | 11.4 |      |
|                     | 0.05    | 0.25       | 0.0  | -0.1                                                             | -0.1 | -0.2 | -0.2 | -0.2 | -1.4                  | -2.6 | -3.5 | -2.9 | -2.8 | -2.9                  | -2.9 | 10.1 | 11.0 | 11.7 | 11.4 | 11.4 | 11.4 | 11.4 |      |
|                     | 0.05    | 0.5        | -0.1 | -0.1                                                             | -0.2 | -0.2 | -0.2 | -0.2 | -2.5                  | -3.5 | -3.5 | -2.8 | -2.9 | -2.8                  | -2.9 | 11.1 | 11.7 | 11.7 | 11.3 | 11.4 | 11.4 | 11.4 |      |
| C5.0                | M       | CP         | -0.1 | -0.3                                                             | -0.2 | -0.2 | -0.2 | -0.2 | -2.3                  | -3.5 | -3.7 | -3.1 | -2.8 | -2.9                  | -2.9 | 10.7 | 11.8 | 11.9 | 11.5 | 11.4 | 11.4 | 11.4 |      |
|                     | 0.005   | 0.1        | -0.1 | -0.2                                                             | -0.1 | -0.2 | -0.2 | -0.2 | -2.3                  | -3.4 | -3.6 | -3.1 | -2.9 | -2.8                  | -2.8 | 10.8 | 11.7 | 11.8 | 11.5 | 11.5 | 11.4 | 11.4 |      |
|                     | 0.005   | 0.25       | -0.1 | -0.1                                                             | -0.1 | -0.2 | -0.2 | -0.2 | -2.3                  | -3.6 | -3.6 | -3.1 | -2.9 | -2.8                  | -2.9 | 11.0 | 11.8 | 11.8 | 11.5 | 11.4 | 11.4 | 11.4 |      |
|                     | 0.005   | 0.5        | -0.1 | -0.1                                                             | -0.2 | -0.2 | -0.2 | -0.2 | -2.4                  | -3.6 | -3.6 | -3.1 | -2.9 | -2.9                  | -2.9 | 11.0 | 11.8 | 11.9 | 11.6 | 11.4 | 11.4 | 11.4 |      |
|                     | 0.01    | 0.1        | -0.2 | -0.2                                                             | -0.1 | -0.2 | -0.2 | -0.2 | -2.4                  | -3.5 | -3.6 | -3.2 | -2.8 | -2.9                  | -2.9 | 11.0 | 11.7 | 11.8 | 11.5 | 11.4 | 11.4 | 11.4 |      |
|                     | 0.01    | 0.25       | -0.2 | -0.1                                                             | -0.2 | -0.2 | -0.2 | -0.2 | -2.2                  | -3.5 | -3.6 | -3.1 | -2.9 | -2.9                  | -2.9 | 10.8 | 11.7 | 11.8 | 11.5 | 11.4 | 11.4 | 11.4 |      |
|                     | 0.01    | 0.5        | -0.2 | -0.1                                                             | -0.1 | -0.2 | -0.2 | -0.2 | -2.5                  | -3.6 | -3.5 | -2.9 | -2.9 | -2.9                  | -2.9 | 11.0 | 11.8 | 11.7 | 11.5 | 11.4 | 11.4 | 11.4 |      |
|                     | 0.05    | 0.1        | -0.2 | -0.2                                                             | -0.2 | -0.2 | -0.2 | -0.2 | -2.5                  | -3.4 | -3.4 | -2.8 | -2.9 | -2.8                  | -2.9 | 11.0 | 11.8 | 11.7 | 11.3 | 11.4 | 11.4 | 11.4 |      |
|                     | 0.05    | 0.25       | -0.2 | -0.2                                                             | -0.2 | -0.2 | -0.2 | -0.2 | -2.5                  | -3.5 | -3.5 | -2.8 | -2.9 | -2.8                  | -2.9 | 11.1 | 11.7 | 11.7 | 11.3 | 11.4 | 11.4 | 11.4 |      |
|                     | 0.05    | 0.5        | -0.1 | -0.1                                                             | -0.2 | -0.1 | -0.2 | -0.2 | -2.8                  | -2.9 | -3.5 | -2.8 | -2.9 | -2.8                  | -2.9 | 11.4 | 11.3 | 11.3 | 11.4 | 11.5 | 11.4 | 11.4 |      |
| CART                | M       | CP         | -0.2 | -0.2                                                             | -0.2 | -0.2 | -0.2 | -0.2 | -2.7                  | -2.8 | -2.9 | -2.9 | -2.9 | -2.8                  | -2.9 | 11.2 | 11.3 | 11.4 | 11.4 | 11.4 | 11.4 | 11.4 |      |
|                     | 0.005   | 0.1        | -0.1 | -0.2                                                             | -0.2 | -0.2 | -0.2 | -0.2 | -3.0                  | -2.7 | -2.9 | -2.8 | -2.9 | -2.9                  | -2.9 | 11.4 | 11.3 | 11.5 | 11.4 | 11.4 | 11.4 | 11.4 |      |
|                     | 0.005   | 0.25       | -0.1 | -0.2                                                             | -0.1 | -0.2 | -0.2 | -0.2 | -2.9                  | -2.9 | -2.9 | -2.8 | -2.9 | -2.8                  | -2.9 | 11.4 | 11.4 | 11.3 | 11.3 | 11.4 | 11.4 | 11.4 |      |
|                     | 0.005   | 0.5        | -0.1 | -0.3                                                             | -0.2 | -0.2 | -0.2 | -0.2 | -2.8                  | -2.9 | -2.9 | -2.9 | -2.9 | -2.8                  | -2.9 | 11.3 | 11.5 | 11.4 | 11.4 | 11.4 | 11.4 | 11.4 |      |
|                     | 0.01    | 0.1        | -0.2 | -0.2                                                             | -0.2 | -0.2 | -0.2 | -0.2 | -2.8                  | -2.8 | -2.9 | -2.9 | -2.9 | -2.9                  | -2.8 | 11.4 | 11.2 | 11.5 | 11.4 | 11.4 | 11.4 | 11.4 |      |
|                     | 0.01    | 0.25       | -0.1 | -0.1                                                             | -0.2 | -0.2 | -0.2 | -0.2 | -2.9                  | -2.8 | -2.9 | -2.9 | -2.9 | -2.9                  | -2.9 | 11.3 | 11.2 | 11.4 | 11.4 | 11.4 | 11.4 | 11.4 |      |
|                     | 0.01    | 0.5        | -0.1 | -0.2                                                             | -0.2 | -0.2 | -0.2 | -0.2 | -2.9                  | -2.8 | -2.8 | -2.8 | -2.8 | -2.8                  | -2.9 | 11.4 | 11.4 | 11.4 | 11.3 | 11.4 | 11.4 | 11.4 |      |
|                     | 0.05    | 0.1        | -0.3 | -0.2                                                             | -0.2 | -0.1 | -0.2 | -0.2 | -2.6                  | -2.9 | -3.0 | -2.9 | -2.8 | -2.9                  | -2.9 | 11.4 | 11.4 | 11.5 | 11.4 | 11.4 | 11.4 | 11.4 |      |
|                     | 0.05    | 0.25       | -0.3 | -0.2                                                             | -0.2 | -0.2 | -0.2 | -0.2 | -2.8                  | -2.9 | -2.8 | -2.8 | -2.9 | -2.9                  | -2.8 | 11.4 | 11.3 | 11.3 | 11.4 | 11.5 | 11.4 | 11.4 |      |
|                     | 0.05    | 0.5        | -0.3 | -0.2                                                             | -0.2 | -0.2 | -0.2 | -0.2 | -2.6                  | -2.9 | -2.8 | -2.8 | -2.9 | -2.9                  | -2.8 | 11.4 | 11.3 | 11.3 | 11.4 | 11.5 | 11.4 | 11.4 |      |
| k-NN                | k       |            | -0.1 | -0.2                                                             | -0.1 | -0.1 | -0.1 | -0.1 | 0.0                   | 0.1  | 0.5  | 0.6  | 0.4  | 0.4                   | 0.2  | 9.6  | 9.6  | 9.1  | 9.0  | 9.2  | 9.1  | 9.2  |      |
|                     | 3       |            | -0.3 | -0.1                                                             | -0.2 | -0.2 | -0.2 | -0.1 | 0.4                   | 0.2  | 0.5  | 0.4  | 0.4  | 0.4                   | 0.5  | 9.3  | 9.2  | 9.1  | 9.1  | 9.2  | 9.1  | 9.1  |      |
|                     | 5       |            | -0.1 | -0.2                                                             | -0.2 | -0.1 | -0.1 | -0.2 | -0.1                  | 0.4  | 0.5  | 0.4  | 0.4  | 0.4                   | 0.5  | 0.5  | 9.3  | 9.1  | 9.2  | 9.2  | 9.1  | 9.2  | 9.1  |
|                     | 7       |            | -0.2 | -0.2                                                             | -0.1 | -0.2 | -0.1 | -0.2 | -0.2                  | 0.5  | 0.3  | 0.4  | 0.5  | 0.5                   | 0.4  | 0.5  | 9.1  | 9.3  | 9.2  | 9.1  | 9.1  | 9.2  | 9.1  |
|                     | 9       |            | -0.2 | -0.2                                                             | -0.1 | -0.2 | -0.2 | -0.2 | -0.2                  | 0.4  | 0.4  | 0.4  | 0.5  | 0.5                   | 0.4  | 0.5  | 9.2  | 9.3  | 9.1  | 9.2  | 9.1  | 9.1  | 9.2  |
|                     | 11      |            | -0.2 | -0.2                                                             | -0.2 | -0.2 | -0.1 | -0.2 | -0.2                  | 0.5  | 0.5  | 0.4  | 0.5  | 0.4                   | 0.5  | 0.4  | 9.2  | 9.1  | 9.2  | 9.1  | 9.2  | 9.1  | 9.1  |
| Naive Bayes         | laplace |            | -0.1 | 0.0                                                              | -0.1 | 0.0  | -0.1 | -0.1 | -0.1                  | -0.7 | -0.9 | -0.9 | -1.0 | -1.0                  | -1.0 | -1.0 | 9.8  | 9.9  | 10.0 | 10.1 | 10.0 | 10.0 | 10.0 |
|                     | 0       |            | -0.1 | 0.0                                                              | -0.1 | -0.1 | -0.1 | -0.1 | -0.1                  | -0.9 | -0.9 | -0.8 | -0.8 | -0.9                  | -0.9 | -1.0 | 10.0 | 9.8  | 9.9  | 9.9  | 10.0 | 10.0 | 10.0 |
|                     | 1       |            | 0.0  | -0.1                                                             | -0.2 | -0.1 | -0.1 | -0.1 | -0.1                  | -0.8 | -1.0 | -0.9 | -1.1 | -1.0                  | -1.0 | -1.0 | 9.8  | 10.3 | 9.9  | 10.1 | 10.1 | 10.0 | 10.0 |
|                     | 2       |            | -0.1 | 0.0                                                              | -0.2 | -0.1 | -0.1 | -0.1 | -0.1                  | -0.5 | -0.9 | -0.7 | -1.1 | -1.0                  | -1.1 | -1.1 | 9.6  | 9.9  | 9.9  | 10.1 | 10.0 | 10.1 | 10.1 |
|                     | 5       |            | -0.1 | -0.1                                                             | -0.1 | -0.1 | -0.1 | -0.1 | -0.1                  | -0.8 | -0.7 | -0.8 | -0.9 | -1.2                  | -1.1 | -1.2 | 9.9  | 9.9  | 9.9  | 10.0 | 10.2 | 10.2 | 10.1 |
| Random Forest       | mtry    |            | 0.2  | 0.2                                                              | 0.1  | 0.6  | 0.7  | 0.4  | 0.2                   | 3.5  | 2.8  | -2.1 | -6.7 | -3.8                  | -2.5 | -2.8 | 6.8  | 6.5  | 9.5  | 13.0 | 12.0 | 11.0 | 11.3 |
|                     | 1       |            | 0.2  | 0.1                                                              | 0.1  | 0.3  | 0.4  | 0.4  | 0.2                   | 4.8  | 3.5  | 1.0  | -2.4 | -2.7                  | -1.9 | -2.6 | 5.9  | 6.2  | 7.7  | 10.2 | 10.2 | 10.1 | 10.8 |
|                     | 2       |            | -0.6 | -0.4                                                             | 0.2  | -0.1 | -0.1 | -0.1 | -0.5                  | 2.2  | 2.0  | 1.7  | 1.9  | 2.1                   | 1.0  | -0.4 | 8.5  | 8.5  | 8.1  | 7.6  | 6.3  | 7.1  | 8.7  |
| GBM                 | ID      | LR         | -0.2 | -0.1                                                             | -0.1 | -0.1 | -0.1 | -0.1 | 0.1                   | 0.0  | 0.1  | -0.1 | 0.1  | 0.2                   | 0.0  | 9.3  | 9.4  | 9.5  | 9.6  | 9.4  | 9.4  | 9.5  |      |
|                     | 4       | 0.1        | -0.1 | -0.2                                                             | -0.1 | -0.2 | -0.2 | -0.2 | -1.1                  | -1.2 | -1.2 | -1.2 | -1.5 | -1.7                  | -1.8 | 10.1 | 10.4 | 10.3 | 10.3 | 10.4 | 10.6 | 10.7 |      |
|                     | 4       | 0.001      | -0.1 | -0.2                                                             | -0.2 | -0.2 | -0.2 | -0.2 | -2.5                  | -2.6 | -2.7 | -2.7 | -2.7 | -2.7                  | -2.7 | 11.1 | 11.2 | 11.2 | 11.3 | 11.3 | 11.3 | 11.3 |      |
|                     | 6       | 0.1        | 0.0  | 0.0                                                              | -0.2 | -0.1 | -0.1 | -0.1 | -0.1                  | -0.1 | 0.1  | 0.0  | 0.0  | 0.0                   | 0.1  | 0.0  | 9.5  | 9.4  | 9.6  | 9.5  | 9.4  | 9.4  | 9.5  |
|                     | 6       | 0.01       | -0.2 | -0.1                                                             | -0.3 | -0.1 | -0.1 | -0.2 | -0.2                  | -1.0 | -1.1 | -1.1 | -1.2 | -1.3                  | -1.4 | -1.6 | 10.2 | 10.2 | 10.3 | 10.2 | 10.3 | 10.4 | 10.5 |
|                     | 6       | 0.001      | -0.2 | -0.3                                                             | -0.2 | -0.2 | -0.2 | -0.2 | -0.2                  | -2.7 | -2.6 | -2.7 | -2.6 | -2.7                  | -2.7 | -2.7 | 11.2 | 11.4 | 11.4 | 11.2 | 11.3 | 11.3 | 11.3 |
|                     | 8       | 0.1        | -0.3 | -0.1                                                             | -0.1 | -0.1 | 0.0  | -0.1 | -0.1                  | 0.1  | 0.1  | 0.2  | 0.1  | 0.1                   | 0.1  | 0.1  | 9.6  | 9.5  | 9.3  | 9.4  | 9.4  | 9.4  | 9.4  |
|                     | 8       | 0.01       | -0.2 | -0.1                                                             | -0.1 | -0.2 | -0.1 | -0.2 | -0.2                  | -1.0 | -0.9 | -1.2 | -1.3 | -1.3                  | -1.2 | -1.3 | 10.1 | 10.0 | 10.3 | 10.4 | 10.3 | 10.3 | 10.4 |
|                     | 8       | 0.001      | -0.3 | -0.1                                                             | -0.2 | -0.2 | -0.2 | -0.2 | -0.2                  | -2.6 | -2.6 | -2.6 | -2.6 | -2.6                  | -2.6 | -2.6 | 11.4 | 11.2 | 11.2 | 11.3 | 11.2 | 11.2 | 11.2 |
