# Supplementary material for: Propensity score adjustment using machine learning classification algorithms to control selection bias in online surveys
Source: PubMed Central journal article supplement (PMC7176094; doi:10.1371/journal.pone.0231500), 2020-04-22
Supplement: pone.0231500.s004.pdf [file pone.0231500.s004.pdf]

S4 Table. Mean Square Error (MSE) on the estimation of vote intention with unequal selection probabilities for the convenience sample based on SRSWOR from the Internet population.

| Method              | Parameters | Convenience (Internet) sample sizes, in thousands of respondents |      |      |      |      |      |                       |      |      |      |      |      |                       |      |       |       |       |       |       |       |       |
|---------------------|------------|------------------------------------------------------------------|------|------|------|------|------|-----------------------|------|------|------|------|------|-----------------------|------|-------|-------|-------|-------|-------|-------|-------|
|                     |            | Estimates for Party 1                                            |      |      |      |      |      | Estimates for Party 2 |      |      |      |      |      | Estimates for Party 3 |      |       |       |       |       |       |       |       |
|                     |            | 0.5                                                              | 0.75 | 1    | 2    | 5    | 10   | 0.5                   | 0.75 | 1    | 2    | 5    | 10   | 0.5                   | 0.75 | 1     | 2     | 5     | 10    |       |       |       |
| No adjustment       |            | 1.9                                                              | 1.2  | 0.9  | 0.5  | 0.2  | 0.1  | 0.1                   | 12.2 | 11.4 | 9.1  | 8.9  | 8.8  | 8.3                   | 8.4  | 131.7 | 134.0 | 131.5 | 130.6 | 129.9 | 129.9 | 130.3 |
| Logistic regression |            | 2.6                                                              | 1.7  | 1.3  | 0.8  | 0.4  | 0.3  | 0.3                   | 7.1  | 5.3  | 3.8  | 2.4  | 1.5  | 1.3                   | 1.2  | 103.2 | 102.6 | 101.9 | 100.7 | 97.8  | 98.7  | 98.6  |
| C4.5                | M CP       | 2.6                                                              | 1.7  | 1.3  | 0.7  | 0.2  | 0.1  | 0.1                   | 8.4  | 15.6 | 15.1 | 12.6 | 8.7  | 8.5                   | 8.4  | 118.3 | 139.9 | 140.2 | 136.8 | 130.8 | 130.3 | 130.3 |
|                     | 0.005 0.1  | 2.8                                                              | 1.8  | 1.4  | 0.6  | 0.2  | 0.1  | 0.1                   | 10.3 | 13.6 | 14.0 | 12.7 | 9.0  | 8.4                   | 8.5  | 120.1 | 130.4 | 138.4 | 140.0 | 131.8 | 130.4 | 130.1 |
|                     | 0.005 0.5  | 2.9                                                              | 1.6  | 1.4  | 0.8  | 0.2  | 0.1  | 0.1                   | 10.6 | 10.0 | 9.9  | 12.1 | 9.5  | 8.4                   | 8.3  | 114.1 | 121.3 | 124.5 | 137.3 | 132.2 | 130.0 | 130.2 |
|                     | 0.01 0.1   | 2.3                                                              | 1.9  | 1.2  | 0.7  | 0.2  | 0.1  | 0.1                   | 11.0 | 15.1 | 14.4 | 12.5 | 8.7  | 8.3                   | 8.3  | 117.7 | 137.1 | 140.5 | 137.9 | 130.7 | 129.7 | 130.5 |
|                     | 0.01 0.25  | 2.5                                                              | 1.8  | 1.2  | 0.6  | 0.2  | 0.1  | 0.1                   | 10.2 | 13.6 | 14.0 | 12.8 | 8.7  | 8.4                   | 8.4  | 119.1 | 133.5 | 139.1 | 140.1 | 130.7 | 129.7 | 129.6 |
|                     | 0.01 0.5   | 2.8                                                              | 1.9  | 1.5  | 0.7  | 0.2  | 0.1  | 0.1                   | 9.1  | 9.6  | 10.6 | 12.6 | 8.6  | 8.4                   | 8.3  | 111.9 | 120.1 | 128.8 | 137.4 | 131.7 | 129.8 | 130.0 |
|                     | 0.05 0.1   | 2.7                                                              | 1.6  | 1.2  | 0.5  | 0.2  | 0.1  | 0.1                   | 9.9  | 15.8 | 15.5 | 9.3  | 8.6  | 8.2                   | 8.6  | 115.9 | 141.1 | 142.4 | 131.2 | 131.0 | 130.2 | 130.6 |
|                     | 0.05 0.25  | 3.0                                                              | 1.7  | 1.2  | 0.5  | 0.2  | 0.1  | 0.1                   | 10.6 | 13.6 | 15.6 | 9.6  | 8.7  | 8.8                   | 8.5  | 115.6 | 131.9 | 141.0 | 131.2 | 130.7 | 131.5 | 130.8 |
|                     | 0.05 0.5   | 2.8                                                              | 1.6  | 1.3  | 0.5  | 0.2  | 0.1  | 0.1                   | 8.4  | 11.9 | 15.1 | 9.1  | 8.4  | 8.5                   | 8.3  | 110.9 | 126.0 | 140.2 | 130.9 | 129.8 | 129.8 | 129.5 |
| C5.0                | M CP       | 2.7                                                              | 1.8  | 1.1  | 0.5  | 0.2  | 0.1  | 0.1                   | 12.8 | 16.1 | 16.1 | 10.9 | 8.2  | 8.6                   | 8.3  | 120.7 | 142.4 | 144.3 | 133.2 | 129.5 | 130.5 | 130.5 |
|                     | 0.005 0.1  | 2.5                                                              | 1.6  | 1.2  | 0.5  | 0.2  | 0.1  | 0.1                   | 12.4 | 15.6 | 16.0 | 11.1 | 8.9  | 8.2                   | 8.3  | 125.3 | 141.4 | 142.2 | 133.6 | 131.6 | 129.6 | 129.8 |
|                     | 0.005 0.5  | 2.6                                                              | 1.8  | 1.3  | 0.5  | 0.2  | 0.1  | 0.1                   | 12.1 | 16.5 | 16.1 | 11.0 | 8.6  | 8.2                   | 8.3  | 127.8 | 144.5 | 142.8 | 134.7 | 130.5 | 130.2 | 129.2 |
|                     | 0.01 0.1   | 2.1                                                              | 1.8  | 1.1  | 0.5  | 0.2  | 0.1  | 0.1                   | 13.2 | 17.2 | 16.0 | 10.9 | 8.6  | 8.4                   | 8.4  | 127.5 | 144.1 | 144.2 | 135.3 | 131.0 | 129.8 | 129.8 |
|                     | 0.01 0.25  | 2.2                                                              | 1.6  | 1.2  | 0.5  | 0.2  | 0.1  | 0.1                   | 12.8 | 15.5 | 15.9 | 11.3 | 8.4  | 8.6                   | 8.6  | 127.8 | 141.5 | 141.4 | 133.9 | 130.8 | 131.2 | 130.9 |
|                     | 0.01 0.5   | 2.5                                                              | 1.7  | 1.2  | 0.4  | 0.2  | 0.1  | 0.1                   | 11.6 | 16.6 | 15.8 | 10.7 | 8.9  | 8.5                   | 8.3  | 124.6 | 141.9 | 143.3 | 133.2 | 131.1 | 131.3 | 129.9 |
|                     | 0.05 0.1   | 2.4                                                              | 1.7  | 1.0  | 0.5  | 0.2  | 0.1  | 0.1                   | 12.6 | 16.9 | 14.5 | 9.7  | 8.6  | 8.4                   | 8.4  | 128.2 | 144.7 | 138.8 | 132.3 | 131.1 | 129.9 | 130.1 |
|                     | 0.05 0.25  | 2.3                                                              | 1.6  | 1.1  | 0.4  | 0.2  | 0.1  | 0.1                   | 13.4 | 16.0 | 14.6 | 9.0  | 8.8  | 8.3                   | 8.4  | 128.6 | 142.9 | 140.4 | 129.7 | 130.5 | 129.6 | 129.9 |
|                     | 0.05 0.5   | 2.6                                                              | 1.8  | 1.1  | 0.5  | 0.2  | 0.1  | 0.1                   | 14.2 | 15.7 | 15.1 | 9.1  | 8.5  | 8.3                   | 8.3  | 130.3 | 141.6 | 141.1 | 128.2 | 130.8 | 130.2 | 129.6 |
| CART                | M CP       | 2.0                                                              | 1.2  | 0.9  | 0.4  | 0.2  | 0.1  | 0.1                   | 11.9 | 10.9 | 10.4 | 9.5  | 8.7  | 8.3                   | 8.4  | 130.5 | 131.6 | 133.1 | 131.4 | 130.7 | 129.7 | 129.8 |
|                     | 0.005 0.1  | 1.9                                                              | 1.3  | 1.0  | 0.5  | 0.2  | 0.1  | 0.1                   | 13.3 | 10.3 | 10.5 | 9.0  | 8.5  | 8.4                   | 8.4  | 133.2 | 130.4 | 135.5 | 130.7 | 130.4 | 130.6 | 130.0 |
|                     | 0.005 0.5  | 1.8                                                              | 1.3  | 0.9  | 0.5  | 0.2  | 0.1  | 0.1                   | 12.6 | 11.3 | 10.4 | 8.8  | 8.5  | 8.2                   | 8.5  | 134.4 | 132.4 | 129.6 | 129.0 | 130.0 | 129.2 | 130.2 |
|                     | 0.01 0.1   | 1.8                                                              | 1.2  | 0.9  | 0.5  | 0.2  | 0.1  | 0.1                   | 12.5 | 11.2 | 10.6 | 9.4  | 8.7  | 8.3                   | 8.3  | 132.4 | 134.0 | 132.7 | 132.2 | 130.8 | 129.6 | 129.5 |
|                     | 0.01 0.25  | 2.0                                                              | 1.3  | 0.9  | 0.5  | 0.2  | 0.1  | 0.1                   | 12.3 | 10.9 | 10.7 | 9.5  | 8.9  | 8.4                   | 8.2  | 134.4 | 129.0 | 134.0 | 131.3 | 130.8 | 129.3 | 129.8 |
|                     | 0.01 0.5   | 1.8                                                              | 1.1  | 0.9  | 0.5  | 0.2  | 0.1  | 0.1                   | 13.0 | 10.9 | 10.8 | 9.4  | 8.8  | 8.4                   | 8.3  | 133.3 | 129.4 | 132.1 | 131.4 | 130.7 | 130.4 | 130.0 |
|                     | 0.05 0.1   | 1.9                                                              | 1.3  | 0.9  | 0.4  | 0.2  | 0.1  | 0.1                   | 13.4 | 10.8 | 10.0 | 9.0  | 8.5  | 8.5                   | 8.3  | 135.4 | 134.3 | 133.4 | 129.5 | 130.8 | 130.9 | 129.9 |
|                     | 0.05 0.25  | 1.8                                                              | 1.3  | 0.8  | 0.4  | 0.2  | 0.1  | 0.1                   | 11.5 | 11.2 | 11.0 | 9.5  | 8.4  | 8.4                   | 8.3  | 133.7 | 133.9 | 133.6 | 131.3 | 129.4 | 129.8 | 130.0 |
|                     | 0.05 0.5   | 1.9                                                              | 1.3  | 0.9  | 0.4  | 0.2  | 0.1  | 0.1                   | 12.4 | 10.9 | 9.8  | 9.0  | 8.8  | 8.5                   | 8.2  | 134.8 | 131.2 | 129.0 | 130.2 | 132.1 | 130.9 | 129.0 |
| k-NN                | k          | 4.0                                                              | 2.3  | 2.1  | 1.2  | 0.6  | 0.5  | 0.4                   | 8.7  | 6.5  | 5.4  | 3.2  | 1.8  | 1.5                   | 1.2  | 101.6 | 98.9  | 88.4  | 83.5  | 85.2  | 84.2  | 85.8  |
|                     | 3          | 2.9                                                              | 2.1  | 1.6  | 1.0  | 0.6  | 0.4  | 0.4                   | 7.7  | 5.6  | 5.4  | 2.8  | 1.7  | 1.5                   | 1.4  | 93.8  | 90.5  | 86.5  | 85.6  | 85.3  | 84.2  | 83.2  |
|                     | 5          | 2.6                                                              | 1.9  | 1.4  | 0.9  | 0.4  | 0.4  | 0.4                   | 6.8  | 5.2  | 3.9  | 2.6  | 1.6  | 1.4                   | 1.4  | 92.7  | 87.8  | 87.3  | 86.5  | 84.5  | 84.7  | 82.9  |
|                     | 7          | 2.2                                                              | 1.6  | 1.2  | 0.8  | 0.4  | 0.4  | 0.3                   | 6.5  | 4.7  | 4.3  | 2.7  | 1.8  | 1.4                   | 1.3  | 89.3  | 91.5  | 87.6  | 85.7  | 84.4  | 84.6  | 83.9  |
|                     | 9          | 2.3                                                              | 1.6  | 1.1  | 0.6  | 0.5  | 0.4  | 0.4                   | 6.0  | 4.7  | 3.7  | 2.6  | 1.7  | 1.5                   | 1.3  | 90.9  | 90.6  | 86.4  | 85.6  | 83.4  | 85.0  | 84.4  |
|                     | 11         | 2.1                                                              | 1.5  | 1.1  | 0.7  | 0.4  | 0.4  | 0.3                   | 6.2  | 4.4  | 3.6  | 2.6  | 1.6  | 1.4                   | 1.3  | 90.3  | 85.8  | 87.6  | 84.6  | 84.9  | 83.7  | 84.3  |
|                     | 13         |                                                                  |      |      |      |      |      |                       |      |      |      |      |      |                       |      |       |       |       |       |       |       |       |
| Naive Bayes         | laplace    | 2.5                                                              | 1.9  | 1.5  | 0.8  | 0.4  | 0.3  | 0.3                   | 7.3  | 5.1  | 4.3  | 3.3  | 2.3  | 2.0                   | 2.0  | 102.9 | 103.1 | 103.3 | 103.1 | 101.7 | 101.4 | 100.5 |
|                     | 0          | 2.3                                                              | 1.6  | 1.3  | 0.8  | 0.4  | 0.3  | 0.3                   | 7.0  | 4.7  | 3.7  | 2.8  | 2.2  | 1.9                   | 1.9  | 107.5 | 101.4 | 100.7 | 100.5 | 100.0 | 100.8 | 101.1 |
|                     | 1          | 2.2                                                              | 1.5  | 1.3  | 0.6  | 0.5  | 0.3  | 0.3                   | 6.8  | 5.3  | 4.3  | 3.1  | 2.4  | 1.9                   | 1.9  | 103.0 | 109.5 | 101.8 | 104.3 | 102.2 | 101.2 | 101.3 |
|                     | 2          | 2.2                                                              | 1.6  | 1.3  | 0.7  | 0.4  | 0.3  | 0.3                   | 5.8  | 4.5  | 4.0  | 3.3  | 2.2  | 2.3                   | 2.2  | 98.0  | 101.6 | 100.5 | 103.7 | 101.1 | 101.8 | 103.1 |
|                     | 5          | 2.2                                                              | 1.5  | 1.2  | 0.7  | 0.4  | 0.3  | 0.3                   | 6.1  | 4.3  | 4.1  | 3.0  | 2.6  | 2.3                   | 2.3  | 103.4 | 101.1 | 101.4 | 102.5 | 104.3 | 103.7 | 103.4 |
|                     | 10         |                                                                  |      |      |      |      |      |                       |      |      |      |      |      |                       |      |       |       |       |       |       |       |       |
| Random Forest       | mtry       | 14.2                                                             | 11.5 | 17.3 | 22.3 | 10.7 | 4.8  | 2.5                   | 25.4 | 46.2 | 56.3 | 90.4 | 36.2 | 17.0                  | 13.3 | 56.8  | 79.4  | 145.4 | 221.1 | 165.8 | 130.0 | 131.5 |
|                     | 1          | 11.2                                                             | 6.7  | 7.6  | 12.6 | 12.5 | 8.9  | 5.7                   | 41.7 | 35.8 | 22.5 | 35.2 | 34.4 | 26.7                  | 23.9 | 48.8  | 55.7  | 80.1  | 131.9 | 130.9 | 123.1 | 132.1 |
|                     | 2          | 19.1                                                             | 10.2 | 24.8 | 6.0  | 10.3 | 11.8 | 11.8                  | 87.9 | 47.1 | 37.5 | 21.4 | 32.3 | 36.8                  | 30.6 | 148.1 | 114.4 | 93.6  | 73.3  | 64.1  | 78.1  | 111.4 |
|                     | 4          |                                                                  |      |      |      |      |      |                       |      |      |      |      |      |                       |      |       |       |       |       |       |       |       |
| GBM                 | ID LR      | 2.2                                                              | 1.9  | 1.4  | 0.8  | 0.4  | 0.4  | 0.3                   | 5.8  | 4.6  | 3.5  | 2.1  | 1.4  | 1.1                   | 0.9  | 93.1  | 93.4  | 93.3  | 94.9  | 89.9  | 88.6  | 90.4  |
|                     | 4 0.1      | 1.9                                                              | 1.3  | 1.0  | 0.5  | 0.2  | 0.1  | 0.1                   | 5.8  | 4.4  | 4.0  | 2.7  | 2.9  | 3.2                   | 3.7  | 106.7 | 110.7 | 107.9 | 106.5 | 109.6 | 111.9 | 114.9 |
|                     | 4 0.001    | 1.8                                                              | 1.3  | 0.9  | 0.5  | 0.2  | 0.1  | 0.1                   | 10.3 | 9.4  | 9.3  | 8.2  | 7.6  | 7.6                   | 7.5  | 128.4 | 129.4 | 128.9 | 128.2 | 127.4 | 128.3 | 126.8 |
|                     | 6 0.1      | 2.6                                                              | 1.9  | 1.5  | 0.8  | 0.5  | 0.4  | 0.3                   | 6.9  | 4.2  | 4.2  | 2.2  | 1.2  | 1.2                   | 1.1  | 96.8  | 92.3  | 96.0  | 92.0  | 89.9  | 89.0  | 90.0  |
|                     | 6 0.01     | 2.1                                                              | 1.3  | 1.0  | 0.4  | 0.2  | 0.1  | 0.1                   | 6.1  | 4.3  | 3.3  | 2.7  | 2.3  | 2.4                   | 2.9  | 109.6 | 108.4 | 108.5 | 106.1 | 107.5 | 108.5 | 111.1 |
|                     | 6 0.001    | 1.7                                                              | 1.2  | 0.9  | 0.4  | 0.2  | 0.1  | 0.1                   | 11.7 | 9.6  | 9.6  | 8.0  | 7.6  | 7.3                   | 7.4  | 130.7 | 132.8 | 131.4 | 126.6 | 128.1 | 126.9 | 127.2 |
|                     | 8 0.1      | 2.8                                                              | 1.9  | 1.5  | 0.8  | 0.5  | 0.4  | 0.4                   | 6.7  | 4.7  | 4.0  | 2.4  | 1.4  | 1.1                   | 1.1  | 99.1  | 94.6  | 91.0  | 90.7  | 88.6  | 89.6  | 88.6  |
|                     | 8 0.01     | 1.8                                                              | 1.2  | 0.9  | 0.5  | 0.2  | 0.2  | 0.1                   | 5.4  | 3.9  | 3.7  | 2.8  | 2.3  | 2.0                   | 2.2  | 106.1 | 103.2 | 109.0 | 109.4 | 106.8 | 106.6 | 107.5 |
|                     | 8 0.001    | 1.8                                                              | 1.2  | 0.8  | 0.5  | 0.2  | 0.1  | 0.1                   | 11.2 | 10.0 | 9.1  | 7.9  | 7.1  | 7.0                   | 7.1  | 133.7 | 127.9 | 128.7 | 128.4 | 126.1 | 126.3 | 126.4 |
