# Supplementary material for: Propensity score adjustment using machine learning classification algorithms to control selection bias in online surveys
Source: PubMed Central journal article supplement (PMC7176094; doi:10.1371/journal.pone.0231500), 2020-04-22
Supplement: pone.0231500.s005.pdf [file pone.0231500.s005.pdf]

S5 Table. Bias on the estimation of vote intention with unequal selection probabilities for the convenience sample based on the logistic formula.

| Method              | Parameters | Convenience (Internet) sample sizes, in thousands of respondents |      |      |      |      |      |                       |       |       |       |       |       |                       |       |       |      |      |      |      |      |      |      |
|---------------------|------------|------------------------------------------------------------------|------|------|------|------|------|-----------------------|-------|-------|-------|-------|-------|-----------------------|-------|-------|------|------|------|------|------|------|------|
|                     |            | Estimates for Party 1                                            |      |      |      |      |      | Estimates for Party 2 |       |       |       |       |       | Estimates for Party 3 |       |       |      |      |      |      |      |      |      |
|                     |            | 0.5                                                              | 0.75 | 1    | 2    | 5    | 7.5  | 10                    | 0.5   | 0.75  | 1     | 2     | 5     | 7.5                   | 10    | 0.5   | 0.75 | 1    | 2    | 5    | 7.5  | 10   |      |
| No adjustment       |            | -0.1                                                             | -0.2 | -0.2 | -0.2 | -0.2 | -0.2 | -0.2                  | -12.7 | -12.6 | -12.6 | -12.4 | -11.9 | -11.4                 | -10.9 | 17.4  | 17.4 | 17.4 | 17.3 | 17.0 | 16.8 | 16.5 |      |
| Logistic regression |            | 0.0                                                              | -0.1 | -0.2 | -0.1 | -0.2 | -0.1 | -0.1                  | -1.0  | -0.9  | -0.9  | -0.7  | -0.5  | -0.5                  | -0.5  | 10.2  | 10.2 | 10.2 | 10.1 | 10.0 | 10.0 | 9.9  |      |
| C4.5                | M          | CP                                                               | -0.2 | -0.2 | -0.2 | -0.2 | -0.2 | -0.2                  | -4.5  | -4.8  | -3.9  | -6.1  | -11.8 | -11.4                 | -11.0 | 12.5  | 12.2 | 11.5 | 12.9 | 17.0 | 16.7 | 16.5 |      |
|                     | 0.005      | 0.1                                                              | -0.2 | -0.2 | -0.3 | -0.2 | -0.2 | -0.2                  | -3.6  | -4.0  | -3.6  | -4.3  | -11.4 | -11.4                 | -11.0 | 11.9  | 11.7 | 11.3 | 11.9 | 16.7 | 16.8 | 16.5 |      |
|                     | 0.005      | 0.25                                                             | -0.2 | -0.1 | -0.1 | -0.1 | -0.1 | -0.2                  | -1.8  | -2.3  | -3.0  | -3.5  | -9.5  | -11.3                 | -10.9 | 11.0  | 10.7 | 10.9 | 11.3 | 15.3 | 16.7 | 16.5 |      |
|                     | 0.01       | 0.1                                                              | -0.2 | -0.2 | -0.2 | -0.2 | -0.2 | -0.2                  | -4.6  | -4.9  | -4.0  | -6.4  | -11.8 | -11.4                 | -10.9 | 12.7  | 12.2 | 11.5 | 13.2 | 17.0 | 16.8 | 16.5 |      |
|                     | 0.01       | 0.25                                                             | 0.0  | -0.1 | -0.1 | -0.1 | -0.2 | -0.2                  | -3.9  | -4.5  | -3.9  | -4.7  | -11.7 | -11.4                 | -10.9 | 12.0  | 12.0 | 11.4 | 11.9 | 16.9 | 16.8 | 16.5 |      |
|                     | 0.01       | 0.5                                                              | 0.0  | -0.2 | -0.3 | 0.0  | -0.1 | -0.2                  | -2.2  | -2.5  | -3.0  | -3.9  | -11.2 | -11.4                 | -10.9 | 10.8  | 10.7 | 11.0 | 11.4 | 16.5 | 16.8 | 16.5 |      |
|                     | 0.05       | 0.1                                                              | -0.1 | -0.2 | -0.2 | -0.2 | -0.2 | -0.2                  | -4.6  | -5.2  | -4.4  | -7.3  | -11.8 | -11.4                 | -11.0 | 12.6  | 12.6 | 11.8 | 13.8 | 17.0 | 16.8 | 16.5 |      |
|                     | 0.05       | 0.25                                                             | -0.2 | -0.2 | -0.1 | -0.2 | -0.2 | -0.2                  | -4.1  | -4.6  | -4.4  | -5.7  | -11.9 | -11.4                 | -10.9 | 12.4  | 12.2 | 11.9 | 12.6 | 17.0 | 16.8 | 16.5 |      |
|                     | 0.05       | 0.5                                                              | 0.0  | -0.1 | 0.0  | -0.2 | -0.2 | -0.2                  | -2.9  | -3.9  | -4.2  | -4.4  | -11.9 | -11.4                 | -11.0 | 11.5  | 11.7 | 11.5 | 11.7 | 16.4 | 17.0 | 16.8 | 16.5 |
|                     | C5.0       | M                                                                | CP   | -0.2 | -0.2 | -0.2 | -0.1 | -0.2                  | -0.2  | -4.4  | -4.6  | -4.5  | -7.9  | -11.8                 | -11.4 | -10.9 | 12.5 | 12.3 | 12.0 | 14.2 | 17.0 | 16.7 | 16.5 |
| 0.005               |            | 0.1                                                              | -0.1 | -0.2 | -0.2 | -0.3 | -0.2 | -0.2                  | -4.0  | -4.7  | -4.5  | -7.5  | -11.9 | -11.4                 | -11.0 | 12.2  | 12.2 | 12.0 | 14.0 | 17.1 | 16.8 | 16.5 |      |
| 0.005               |            | 0.25                                                             | -0.2 | -0.2 | -0.2 | -0.1 | -0.2 | -0.2                  | -4.3  | -4.4  | -4.6  | -7.5  | -11.9 | -11.4                 | -10.9 | 12.4  | 12.1 | 12.0 | 13.9 | 17.0 | 16.8 | 16.5 |      |
| 0.01                |            | 0.1                                                              | -0.1 | -0.2 | -0.1 | -0.2 | -0.2 | -0.2                  | -5.0  | -4.7  | -4.5  | -8.1  | -11.9 | -11.4                 | -10.9 | 12.9  | 12.2 | 11.9 | 14.4 | 17.0 | 16.7 | 16.5 |      |
| 0.01                |            | 0.25                                                             | -0.2 | -0.2 | -0.2 | -0.3 | -0.2 | -0.2                  | -4.2  | -4.5  | -4.5  | -7.8  | -11.9 | -11.4                 | -10.9 | 12.3  | 12.1 | 12.1 | 14.2 | 17.0 | 16.8 | 16.5 |      |
| 0.01                |            | 0.5                                                              | -0.2 | -0.1 | -0.1 | -0.2 | -0.2 | -0.2                  | -4.1  | -4.5  | -4.6  | -7.8  | -11.9 | -11.4                 | -10.9 | 12.3  | 12.0 | 12.1 | 14.0 | 17.0 | 16.8 | 16.5 |      |
| 0.05                |            | 0.1                                                              | -0.3 | -0.1 | -0.2 | -0.2 | -0.1 | -0.2                  | -4.5  | -4.7  | -4.4  | -8.7  | -11.9 | -11.4                 | -10.9 | 12.7  | 12.3 | 12.0 | 14.7 | 17.0 | 16.7 | 16.5 |      |
| 0.05                |            | 0.25                                                             | -0.2 | -0.1 | -0.1 | -0.2 | -0.2 | -0.2                  | -4.2  | -4.7  | -4.3  | -8.6  | -11.9 | -11.4                 | -10.9 | 12.4  | 12.2 | 11.9 | 14.7 | 17.0 | 16.8 | 16.5 |      |
| 0.05                |            | 0.5                                                              | -0.2 | -0.3 | -0.2 | -0.2 | -0.2 | -0.1                  | -4.5  | -4.6  | -4.8  | -8.2  | -11.8 | -11.5                 | -10.9 | 12.5  | 12.5 | 12.3 | 14.4 | 17.0 | 16.8 | 16.5 |      |
| CART                |            | M                                                                | CP   | -0.2 | -0.2 | -0.2 | -0.2 | -0.1                  | -0.2  | -4.5  | -5.5  | -8.7  | -12.4 | -11.9                 | -11.4 | -10.9 | 12.6 | 13.1 | 14.9 | 17.3 | 17.0 | 16.8 | 16.5 |
|                     | 0.005      | 0.1                                                              | -0.3 | -0.2 | -0.2 | -0.2 | -0.2 | -0.2                  | -5.5  | -12.5 | -12.5 | -12.4 | -11.9 | -11.4                 | -11.0 | 13.5  | 17.4 | 17.4 | 17.3 | 17.0 | 16.8 | 16.5 |      |
|                     | 0.005      | 0.25                                                             | -0.2 | -0.2 | -0.2 | -0.2 | -0.2 | -0.2                  | -12.7 | -12.5 | -12.4 | -12.5 | -11.8 | -11.4                 | -10.9 | 17.4  | 17.4 | 17.3 | 17.4 | 17.0 | 16.8 | 16.5 |      |
|                     | 0.01       | 0.1                                                              | -0.2 | -0.2 | -0.1 | -0.2 | -0.2 | -0.2                  | -4.5  | -5.5  | -8.9  | -12.4 | -11.9 | -11.4                 | -10.9 | 12.8  | 13.1 | 15.0 | 17.3 | 17.0 | 16.8 | 16.5 |      |
|                     | 0.01       | 0.25                                                             | -0.3 | -0.1 | -0.2 | -0.2 | -0.2 | -0.2                  | -5.6  | -12.5 | -12.5 | -12.4 | -11.8 | -11.4                 | -10.9 | 13.4  | 17.2 | 17.3 | 17.3 | 17.0 | 16.7 | 16.5 |      |
|                     | 0.01       | 0.5                                                              | -0.1 | -0.1 | -0.1 | -0.2 | -0.2 | -0.2                  | -12.5 | -12.6 | -12.5 | -12.3 | -11.9 | -11.4                 | -10.9 | 17.3  | 17.4 | 17.3 | 17.2 | 17.0 | 16.7 | 16.5 |      |
|                     | 0.05       | 0.1                                                              | -0.2 | -0.1 | -0.1 | -0.2 | -0.2 | -0.2                  | -4.5  | -5.6  | -8.5  | -12.4 | -11.9 | -11.4                 | -10.9 | 12.8  | 13.1 | 14.5 | 17.3 | 17.0 | 16.8 | 16.5 |      |
|                     | 0.05       | 0.25                                                             | -0.2 | -0.2 | -0.2 | -0.2 | -0.2 | -0.2                  | -5.8  | -12.5 | -12.6 | -12.4 | -11.9 | -11.4                 | -10.9 | 13.6  | 17.3 | 17.4 | 17.3 | 17.0 | 16.8 | 16.5 |      |
|                     | 0.05       | 0.5                                                              | -0.1 | -0.1 | -0.2 | -0.2 | -0.2 | -0.2                  | -12.6 | -12.5 | -12.5 | -12.3 | -11.8 | -11.4                 | -10.9 | 17.4  | 17.3 | 17.4 | 17.2 | 17.0 | 16.8 | 16.5 |      |
|                     | k-NN       | k                                                                |      | -0.2 | -0.3 | -0.1 | -0.1 | -0.1                  | -0.1  | -2.4  | -1.6  | -1.0  | -0.1  | 0.1                   | 0.0   | -0.1  | 11.4 | 10.7 | 10.5 | 9.6  | 9.3  | 9.4  | 9.4  |
| 3                   |            |                                                                  | -0.2 | -0.2 | -0.1 | -0.2 | -0.1 | -0.2                  | -1.3  | -0.6  | -0.6  | 0.1   | 0.3   | 0.4                   | 0.3   | 10.7  | 9.9  | 10.0 | 9.4  | 9.2  | 9.3  | 9.3  |      |
| 5                   |            |                                                                  | -0.1 | -0.2 | -0.1 | -0.1 | -0.2 | -0.1                  | -0.7  | 0.0   | 0.0   | 0.5   | 0.6   | 0.3                   | 0.3   | 10.0  | 9.6  | 9.5  | 9.2  | 9.0  | 9.2  | 9.2  |      |
| 7                   |            |                                                                  | -0.2 | -0.2 | -0.2 | -0.2 | -0.1 | -0.1                  | -0.4  | 0.1   | 0.2   | 0.3   | 0.5   | 0.4                   | 0.3   | 9.7   | 9.5  | 9.3  | 9.3  | 9.1  | 9.2  | 9.2  |      |
| 9                   |            |                                                                  | -0.2 | -0.2 | -0.1 | -0.1 | -0.1 | -0.1                  | -0.3  | 0.3   | 0.4   | 0.5   | 0.4   | 0.5                   | 0.5   | 9.9   | 9.3  | 9.2  | 9.1  | 9.1  | 9.1  | 9.1  |      |
| 11                  |            |                                                                  | -0.1 | -0.1 | -0.2 | -0.2 | -0.2 | -0.2                  | -0.3  | 0.0   | 0.3   | 0.3   | 0.5   | 0.4                   | 0.3   | 9.8   | 9.4  | 9.2  | 9.3  | 9.1  | 9.1  | 9.2  |      |
| 13                  |            |                                                                  | -0.1 | -0.1 | -0.2 | -0.2 | -0.2 | -0.2                  | -0.3  | 0.0   | 0.3   | 0.3   | 0.5   | 0.4                   | 0.3   | 9.8   | 9.4  | 9.2  | 9.3  | 9.1  | 9.1  | 9.2  |      |
| Naive Bayes         | laplace    |                                                                  | 0.1  | 0.0  | -0.1 | -0.3 | -0.1 | 0.0                   | 4.7   | 5.0   | 5.3   | 4.9   | 4.2   | 3.9                   | 3.4   | 5.1   | 5.0  | 5.2  | 5.3  | 5.9  | 6.0  | 6.5  |      |
|                     | 0          |                                                                  | 0.0  | 0.0  | -0.1 | -0.1 | -0.1 | -0.1                  | 4.8   | 5.0   | 4.8   | 4.9   | 4.3   | 3.6                   | 3.3   | 5.2   | 5.0  | 5.5  | 5.2  | 5.7  | 6.3  | 6.5  |      |
|                     | 1          |                                                                  | -0.1 | 0.1  | 0.0  | -0.3 | 0.0  | -0.1                  | 5.1   | 4.4   | 4.9   | 5.0   | 4.2   | 3.7                   | 3.3   | 5.2   | 5.4  | 5.1  | 5.4  | 5.7  | 6.2  | 6.6  |      |
|                     | 2          |                                                                  | -0.1 | -0.3 | -0.1 | 0.0  | -0.1 | 0.0                   | 5.4   | 5.1   | 5.1   | 4.9   | 4.2   | 3.6                   | 3.3   | 5.0   | 5.1  | 5.2  | 5.1  | 5.8  | 6.1  | 6.6  |      |
|                     | 5          |                                                                  | 0.2  | -0.2 | -0.2 | -0.1 | -0.1 | 0.0                   | 4.6   | 5.2   | 4.7   | 4.7   | 4.0   | 3.6                   | 3.1   | 5.0   | 5.1  | 5.4  | 5.5  | 5.9  | 6.2  | 6.7  |      |
| Random Forest       | mtry       |                                                                  | -0.2 | 0.0  | -0.1 | 0.1  | 0.2  | -0.1                  | 3.2   | 6.3   | 7.2   | 8.4   | 5.8   | 2.4                   | -1.2  | 7.8   | 5.2  | 3.8  | 1.6  | 4.5  | 7.5  | 10.1 |      |
|                     | 1          |                                                                  | 0.2  | -0.1 | -0.3 | 0.1  | 0.0  | 0.1                   | 8.2   | 9.3   | 11.4  | 11.4  | 9.1   | 6.8                   | 4.7   | 3.7   | 2.8  | 0.8  | 0.0  | 1.7  | 3.5  | 5.5  |      |
|                     | 2          |                                                                  | -0.3 | -0.6 | -0.2 | 0.0  | 0.7  | 0.0                   | 0.6   | 3.2   | 5.2   | 9.1   | 11.0  | 9.8                   | 7.8   | 9.5   | 7.5  | 6.3  | 2.9  | -0.6 | 0.1  | 1.9  |      |
| GBM                 | ID         | LR                                                               | 0.0  | -0.1 | -0.2 | -0.1 | -0.2 | -0.1                  | -0.8  | -0.4  | -0.4  | -0.4  | -0.2  | -0.3                  | -0.3  | 10.0  | 9.7  | 9.8  | 9.8  | 9.6  | 9.7  | 9.6  |      |
|                     | 4          | 0.1                                                              | -0.2 | -0.2 | -0.2 | -0.2 | -0.2 | -0.2                  | -5.9  | -5.6  | -5.8  | -5.8  | -5.6  | -5.4                  | -5.3  | 13.4  | 13.0 | 13.2 | 13.1 | 12.9 | 12.8 | 12.7 |      |
|                     | 4          | 0.001                                                            | -0.2 | -0.3 | -0.2 | -0.2 | -0.2 | -0.2                  | -11.7 | -11.6 | -11.6 | -11.5 | -11.1 | -10.6                 | -10.2 | 16.9  | 16.8 | 16.8 | 16.8 | 16.5 | 16.2 | 16.0 |      |
|                     | 6          | 0.1                                                              | -0.2 | 0.0  | 0.0  | -0.2 | -0.1 | -0.1                  | -1.1  | -0.6  | -0.5  | -0.3  | -0.2  | -0.1                  | -0.2  | 10.4  | 9.8  | 9.7  | 9.8  | 9.6  | 9.5  | 9.5  |      |
|                     | 6          | 0.01                                                             | 0.0  | -0.2 | -0.2 | -0.2 | -0.1 | -0.1                  | -5.9  | -5.8  | -5.6  | -5.5  | -5.2  | -5.1                  | -5.0  | 13.3  | 13.2 | 13.1 | 13.0 | 12.7 | 12.6 | 12.6 |      |
|                     | 6          | 0.001                                                            | -0.2 | -0.2 | -0.1 | -0.1 | -0.2 | -0.2                  | -11.7 | -11.6 | -11.6 | -11.5 | -10.9 | -10.5                 | -10.1 | 16.9  | 16.8 | 16.8 | 16.7 | 16.4 | 16.2 | 16.0 |      |
|                     | 8          | 0.1                                                              | 0.0  | -0.1 | 0.1  | -0.1 | -0.1 | -0.1                  | -1.2  | -0.8  | -0.9  | -0.5  | -0.2  | 0.0                   | -0.1  | 10.3  | 9.9  | 10.0 | 9.7  | 9.6  | 9.4  | 9.5  |      |
|                     | 8          | 0.01                                                             | -0.2 | -0.2 | -0.2 | -0.1 | -0.2 | -0.2                  | -5.7  | -5.8  | -5.7  | -5.4  | -5.1  | -4.9                  | -4.8  | 13.3  | 13.4 | 13.3 | 12.9 | 12.7 | 12.5 | 12.5 |      |
|                     | 8          | 0.001                                                            | -0.3 | -0.2 | -0.1 | -0.2 | -0.2 | -0.2                  | -11.7 | -11.6 | -11.7 | -11.5 | -10.9 | -10.5                 | -10.0 | 17.0  | 16.8 | 16.8 | 16.8 | 16.4 | 16.1 | 15.9 |      |
