# Supplementary material for: Propensity score adjustment using machine learning classification algorithms to control selection bias in online surveys
Source: PubMed Central journal article supplement (PMC7176094; doi:10.1371/journal.pone.0231500), 2020-04-22
Supplement: pone.0231500.s006.pdf [file pone.0231500.s006.pdf]

S6 Table. Mean Square Error (MSE) on the estimation of vote intention with unequal selection probabilities for the convenience sample based on the logistic formula.

| Method              | Parameters | Convenience (Internet) sample sizes, in thousands of respondents |      |      |      |      |      |      |                       |       |       |       |       |       |       |                       |       |       |       |       |       |       |       |  |  |  |  |  |  |  |  |
|---------------------|------------|------------------------------------------------------------------|------|------|------|------|------|------|-----------------------|-------|-------|-------|-------|-------|-------|-----------------------|-------|-------|-------|-------|-------|-------|-------|--|--|--|--|--|--|--|--|
|                     |            | Estimates for Party 1                                            |      |      |      |      |      |      | Estimates for Party 2 |       |       |       |       |       |       | Estimates for Party 3 |       |       |       |       |       |       |       |  |  |  |  |  |  |  |  |
|                     |            | 0.5                                                              | 0.75 | 1    | 2    | 5    | 7.5  | 10   | 0.5                   | 0.75  | 1     | 2     | 5     | 7.5   | 10    | 0.5                   | 0.75  | 1     | 2     | 5     | 7.5   | 10    |       |  |  |  |  |  |  |  |  |
| No adjustment       |            | 1.7                                                              | 1.1  | 0.8  | 0.4  | 0.2  | 0.1  | 0.1  | 163.7                 | 161.1 | 159.6 | 154.5 | 141.9 | 130.8 | 119.7 | 308.6                 | 306.3 | 302.9 | 299.5 | 290.6 | 281.3 | 271.4 |       |  |  |  |  |  |  |  |  |
| Logistic regression |            | 3.6                                                              | 2.5  | 1.8  | 1.1  | 0.5  | 0.4  | 0.4  | 10.5                  | 7.8   | 6.2   | 3.5   | 1.6   | 1.4   | 1.2   | 112.9                 | 109.6 | 107.9 | 103.5 | 100.9 | 100.3 | 99.6  |       |  |  |  |  |  |  |  |  |
| C4.5                | M          | CP                                                               | 3.4  | 2.2  | 2.1  | 1.0  | 0.2  | 0.1  | 0.1                   | 31.3  | 30.9  | 22.7  | 53.7  | 140.5 | 130.2 | 120.4                 | 166.6 | 155.5 | 138.1 | 176.9 | 288.7 | 280.0 | 272.6 |  |  |  |  |  |  |  |  |
|                     | 0.005      | 0.1                                                              | 3.5  | 2.6  | 2.1  | 1.2  | 0.2  | 0.1  | 0.1                   | 24.7  | 25.9  | 20.5  | 28.6  | 133.0 | 130.5 | 120.1                 | 152.6 | 145.5 | 134.0 | 147.4 | 281.5 | 282.1 | 272.5 |  |  |  |  |  |  |  |  |
|                     | 0.005      | 0.5                                                              | 3.9  | 3.1  | 2.7  | 1.1  | 0.3  | 0.1  | 0.1                   | 16.7  | 16.3  | 17.6  | 17.4  | 101.8 | 129.1 | 119.8                 | 131.0 | 121.4 | 124.9 | 130.1 | 241.7 | 279.9 | 272.6 |  |  |  |  |  |  |  |  |
|                     | 0.01       | 0.1                                                              | 3.0  | 2.6  | 2.1  | 0.9  | 0.2  | 0.1  | 0.1                   | 30.4  | 32.4  | 24.4  | 58.4  | 140.3 | 131.2 | 119.7                 | 172.0 | 156.3 | 137.5 | 181.6 | 289.1 | 282.0 | 272.4 |  |  |  |  |  |  |  |  |
|                     | 0.01       | 0.25                                                             | 3.6  | 2.7  | 2.1  | 0.9  | 0.2  | 0.1  | 0.1                   | 25.6  | 29.0  | 22.6  | 32.2  | 138.2 | 131.1 | 119.9                 | 153.2 | 152.0 | 135.7 | 148.4 | 287.0 | 281.6 | 271.9 |  |  |  |  |  |  |  |  |
|                     | 0.01       | 0.5                                                              | 4.3  | 3.2  | 2.3  | 1.2  | 0.2  | 0.1  | 0.1                   | 16.6  | 16.8  | 17.5  | 21.2  | 129.6 | 131.2 | 119.7                 | 127.3 | 122.3 | 127.9 | 134.6 | 274.9 | 281.8 | 272.5 |  |  |  |  |  |  |  |  |
|                     | 0.05       | 0.1                                                              | 3.0  | 2.2  | 1.7  | 0.7  | 0.2  | 0.1  | 0.1                   | 30.0  | 33.7  | 25.9  | 73.2  | 140.7 | 131.1 | 120.1                 | 168.1 | 163.6 | 144.9 | 199.3 | 289.6 | 281.9 | 271.5 |  |  |  |  |  |  |  |  |
|                     | 0.05       | 0.25                                                             | 3.2  | 2.1  | 1.7  | 0.8  | 0.2  | 0.1  | 0.1                   | 28.0  | 28.9  | 26.2  | 48.9  | 141.8 | 130.8 | 119.8                 | 162.2 | 153.7 | 146.0 | 167.1 | 290.5 | 282.0 | 272.4 |  |  |  |  |  |  |  |  |
|                     | 0.05       | 0.5                                                              | 3.8  | 2.6  | 1.9  | 0.8  | 0.2  | 0.1  | 0.1                   | 18.5  | 23.4  | 24.3  | 28.4  | 141.6 | 130.7 | 120.5                 | 141.8 | 142.5 | 137.1 | 141.6 | 289.5 | 281.4 | 272.7 |  |  |  |  |  |  |  |  |
| C5.0                | M          | CP                                                               | 3.0  | 2.1  | 1.9  | 0.7  | 0.2  | 0.1  | 0.1                   | 28.3  | 29.9  | 28.4  | 80.8  | 140.2 | 130.5 | 119.6                 | 164.4 | 158.0 | 148.9 | 211.3 | 288.5 | 279.9 | 272.5 |  |  |  |  |  |  |  |  |
|                     | 0.005      | 0.25                                                             | 3.4  | 2.3  | 1.7  | 0.8  | 0.2  | 0.1  | 0.1                   | 26.6  | 30.9  | 28.9  | 74.0  | 142.8 | 130.2 | 120.1                 | 158.7 | 155.5 | 150.4 | 204.7 | 291.4 | 281.1 | 272.5 |  |  |  |  |  |  |  |  |
|                     | 0.005      | 0.5                                                              | 3.0  | 2.4  | 1.7  | 0.7  | 0.2  | 0.1  | 0.1                   | 28.3  | 28.4  | 31.9  | 74.2  | 141.4 | 131.0 | 119.3                 | 162.5 | 153.0 | 150.6 | 201.8 | 290.7 | 280.8 | 272.0 |  |  |  |  |  |  |  |  |
|                     | 0.01       | 0.1                                                              | 3.4  | 2.3  | 1.8  | 0.8  | 0.2  | 0.1  | 0.1                   | 34.6  | 31.1  | 29.3  | 85.3  | 141.6 | 130.3 | 119.8                 | 174.5 | 155.0 | 148.0 | 216.3 | 288.8 | 280.2 | 272.2 |  |  |  |  |  |  |  |  |
|                     | 0.01       | 0.25                                                             | 3.3  | 2.3  | 1.6  | 0.8  | 0.2  | 0.1  | 0.1                   | 28.1  | 29.1  | 29.6  | 81.3  | 141.7 | 131.0 | 119.7                 | 160.6 | 154.3 | 151.6 | 211.5 | 290.7 | 281.1 | 272.9 |  |  |  |  |  |  |  |  |
|                     | 0.01       | 0.5                                                              | 3.5  | 2.4  | 1.5  | 0.8  | 0.2  | 0.1  | 0.1                   | 25.9  | 29.8  | 31.0  | 80.1  | 141.7 | 131.3 | 119.5                 | 160.3 | 151.2 | 152.3 | 207.4 | 289.5 | 281.5 | 271.9 |  |  |  |  |  |  |  |  |
|                     | 0.05       | 0.1                                                              | 3.0  | 2.2  | 1.8  | 0.6  | 0.2  | 0.1  | 0.1                   | 29.7  | 29.4  | 28.9  | 95.8  | 141.4 | 130.5 | 119.8                 | 171.0 | 157.9 | 149.9 | 226.4 | 289.4 | 280.7 | 272.4 |  |  |  |  |  |  |  |  |
|                     | 0.05       | 0.25                                                             | 3.3  | 2.2  | 1.8  | 0.7  | 0.2  | 0.1  | 0.1                   | 28.2  | 31.5  | 28.1  | 94.0  | 141.0 | 130.5 | 119.8                 | 162.1 | 155.1 | 146.8 | 225.8 | 289.6 | 280.4 | 272.7 |  |  |  |  |  |  |  |  |
|                     | 0.05       | 0.5                                                              | 3.1  | 2.2  | 1.5  | 0.7  | 0.2  | 0.1  | 0.1                   | 29.3  | 30.0  | 31.7  | 87.6  | 140.5 | 131.3 | 119.8                 | 164.3 | 161.9 | 156.9 | 216.9 | 288.4 | 281.7 | 271.6 |  |  |  |  |  |  |  |  |
| CART                | M          | CP                                                               | 2.8  | 1.5  | 1.2  | 0.5  | 0.2  | 0.1  | 0.1                   | 28.3  | 39.1  | 92.0  | 154.1 | 141.4 | 130.3 | 119.8                 | 165.2 | 178.0 | 232.1 | 299.2 | 289.9 | 281.4 | 273.3 |  |  |  |  |  |  |  |  |
|                     | 0.005      | 0.25                                                             | 2.9  | 1.2  | 0.9  | 0.4  | 0.2  | 0.1  | 0.1                   | 45.0  | 159.0 | 158.6 | 153.6 | 141.8 | 130.8 | 120.1                 | 191.7 | 306.0 | 306.9 | 299.8 | 289.4 | 281.2 | 273.1 |  |  |  |  |  |  |  |  |
|                     | 0.005      | 0.5                                                              | 1.8  | 1.2  | 0.8  | 0.4  | 0.2  | 0.1  | 0.1                   | 163.7 | 159.3 | 155.9 | 155.9 | 140.7 | 130.7 | 119.4                 | 306.4 | 304.7 | 302.6 | 302.3 | 289.4 | 281.3 | 271.3 |  |  |  |  |  |  |  |  |
|                     | 0.01       | 0.1                                                              | 2.7  | 1.8  | 1.1  | 0.5  | 0.2  | 0.1  | 0.1                   | 28.7  | 38.3  | 95.7  | 153.5 | 140.9 | 130.0 | 119.9                 | 169.5 | 177.4 | 232.8 | 301.2 | 289.5 | 280.9 | 272.7 |  |  |  |  |  |  |  |  |
|                     | 0.01       | 0.25                                                             | 2.7  | 1.1  | 0.9  | 0.5  | 0.2  | 0.1  | 0.1                   | 46.7  | 158.7 | 159.3 | 153.6 | 140.7 | 129.5 | 119.6                 | 190.5 | 298.7 | 303.3 | 300.6 | 290.2 | 279.9 | 271.9 |  |  |  |  |  |  |  |  |
|                     | 0.01       | 0.5                                                              | 1.7  | 1.3  | 0.9  | 0.4  | 0.2  | 0.1  | 0.1                   | 159.8 | 162.3 | 157.6 | 152.7 | 141.5 | 130.6 | 119.8                 | 302.9 | 307.4 | 302.3 | 297.9 | 289.1 | 280.8 | 272.2 |  |  |  |  |  |  |  |  |
|                     | 0.05       | 0.1                                                              | 2.4  | 1.9  | 1.1  | 0.5  | 0.2  | 0.1  | 0.1                   | 28.5  | 39.7  | 88.1  | 154.9 | 141.7 | 131.0 | 119.7                 | 170.4 | 176.3 | 219.7 | 302.0 | 290.5 | 281.8 | 272.2 |  |  |  |  |  |  |  |  |
|                     | 0.05       | 0.25                                                             | 2.8  | 1.3  | 0.9  | 0.4  | 0.2  | 0.1  | 0.1                   | 49.9  | 159.6 | 160.8 | 154.0 | 141.0 | 131.1 | 119.4                 | 192.7 | 303.5 | 306.5 | 300.6 | 288.0 | 281.7 | 270.8 |  |  |  |  |  |  |  |  |
|                     | 0.05       | 0.5                                                              | 1.8  | 1.2  | 0.8  | 0.4  | 0.2  | 0.1  | 0.1                   | 161.4 | 159.9 | 157.1 | 152.0 | 140.5 | 131.0 | 119.6                 | 306.4 | 303.4 | 306.6 | 297.4 | 288.9 | 281.1 | 271.9 |  |  |  |  |  |  |  |  |
| k-NN                | k          |                                                                  | 4.8  | 3.1  | 2.8  | 1.8  | 0.8  | 0.6  | 0.5                   | 17.4  | 11.0  | 8.7   | 4.7   | 2.1   | 1.9   | 1.5                   | 139.8 | 123.5 | 115.4 | 95.9  | 88.8  | 89.5  | 89.8  |  |  |  |  |  |  |  |  |
|                     | 3          |                                                                  | 4.4  | 3.2  | 2.6  | 1.5  | 0.8  | 0.6  | 0.4                   | 14.1  | 9.1   | 7.8   | 4.2   | 2.2   | 1.8   | 1.5                   | 124.2 | 104.6 | 106.6 | 91.8  | 85.7  | 86.6  | 86.6  |  |  |  |  |  |  |  |  |
|                     | 5          |                                                                  | 3.7  | 3.2  | 2.1  | 1.3  | 0.7  | 0.5  | 0.4                   | 12.2  | 9.2   | 6.9   | 4.5   | 2.5   | 1.8   | 1.5                   | 110.0 | 99.3  | 94.8  | 87.2  | 83.1  | 84.9  | 85.5  |  |  |  |  |  |  |  |  |
|                     | 7          |                                                                  | 4.1  | 3.2  | 2.2  | 1.4  | 0.7  | 0.5  | 0.4                   | 11.5  | 9.3   | 7.4   | 4.1   | 2.4   | 1.8   | 1.4                   | 104.1 | 97.4  | 92.3  | 90.1  | 85.0  | 85.6  | 85.4  |  |  |  |  |  |  |  |  |
|                     | 9          |                                                                  | 3.8  | 3.0  | 2.0  | 1.2  | 0.6  | 0.5  | 0.4                   | 11.6  | 8.8   | 6.4   | 4.1   | 2.1   | 1.7   | 1.7                   | 107.7 | 94.2  | 89.8  | 85.8  | 84.1  | 83.9  | 83.2  |  |  |  |  |  |  |  |  |
|                     | 11         |                                                                  | 4.2  | 2.7  | 2.4  | 1.1  | 0.6  | 0.4  | 0.4                   | 11.3  | 9.0   | 6.5   | 3.5   | 2.2   | 1.9   | 1.5                   | 105.3 | 95.2  | 89.2  | 88.8  | 84.0  | 84.8  | 85.7  |  |  |  |  |  |  |  |  |
|                     | 13         |                                                                  |      |      |      |      |      |      |                       |       |       |       |       |       |       |                       |       |       |       |       |       |       |       |  |  |  |  |  |  |  |  |
| Naive Bayes         | laplace    |                                                                  | 17.5 | 11.6 | 9.2  | 4.3  | 1.6  | 1.0  | 0.6                   | 70.4  | 61.3  | 55.1  | 36.3  | 22.5  | 18.3  | 13.7                  | 58.2  | 48.2  | 46.6  | 36.9  | 37.9  | 38.9  | 43.7  |  |  |  |  |  |  |  |  |
|                     | 0          |                                                                  | 20.7 | 12.3 | 9.0  | 3.9  | 1.7  | 1.1  | 0.6                   | 75.4  | 58.7  | 48.4  | 36.5  | 23.9  | 15.7  | 13.0                  | 64.7  | 47.6  | 48.7  | 35.5  | 35.8  | 41.9  | 44.4  |  |  |  |  |  |  |  |  |
|                     | 1          |                                                                  | 17.8 | 10.7 | 9.7  | 4.4  | 1.6  | 0.9  | 0.6                   | 77.1  | 52.1  | 49.3  | 39.4  | 22.7  | 16.5  | 13.3                  | 63.2  | 54.7  | 44.3  | 39.3  | 36.2  | 40.9  | 44.8  |  |  |  |  |  |  |  |  |
|                     | 2          |                                                                  | 18.4 | 9.4  | 7.0  | 3.5  | 1.6  | 0.9  | 0.6                   | 76.8  | 63.0  | 49.8  | 36.5  | 23.0  | 16.5  | 13.5                  | 55.4  | 50.2  | 45.3  | 34.6  | 36.9  | 39.9  | 44.6  |  |  |  |  |  |  |  |  |
|                     | 5          |                                                                  | 20.7 | 11.0 | 7.6  | 4.5  | 1.5  | 0.8  | 0.6                   | 70.5  | 63.0  | 47.0  | 34.0  | 20.9  | 16.3  | 12.1                  | 57.6  | 50.1  | 46.9  | 39.7  | 38.0  | 40.8  | 45.7  |  |  |  |  |  |  |  |  |
| Random Forest       | mtry       |                                                                  | 11.1 | 6.7  | 6.7  | 8.2  | 8.3  | 5.3  | 2.9                   | 28.6  | 55.3  | 68.1  | 102.7 | 60.3  | 22.2  | 9.6                   | 76.8  | 40.6  | 30.7  | 26.7  | 41.3  | 68.0  | 108.6 |  |  |  |  |  |  |  |  |
|                     | 1          |                                                                  | 23.9 | 10.4 | 10.1 | 10.4 | 7.0  | 7.2  | 6.3                   | 124.6 | 111.5 | 158.3 | 157.5 | 104.8 | 67.2  | 40.8                  | 59.9  | 27.8  | 24.0  | 20.8  | 21.5  | 30.2  | 47.1  |  |  |  |  |  |  |  |  |
|                     | 2          |                                                                  | 22.3 | 18.7 | 21.3 | 25.3 | 17.8 | 20.0 | 11.9                  | 85.4  | 79.7  | 111.2 | 160.1 | 161.7 | 138.4 | 93.9                  | 169.1 | 116.8 | 95.8  | 71.9  | 28.3  | 28.3  | 30.0  |  |  |  |  |  |  |  |  |
|                     | 4          |                                                                  |      |      |      |      |      |      |                       |       |       |       |       |       |       |                       |       |       |       |       |       |       |       |  |  |  |  |  |  |  |  |
| GBM                 | ID         | LR                                                               | 4.4  | 2.6  | 2.1  | 1.3  | 0.6  | 0.4  | 0.3                   | 13.8  | 7.8   | 6.8   | 3.8   | 1.9   | 1.3   | 1.2                   | 109.2 | 100.2 | 101.6 | 97.8  | 93.7  | 94.1  | 91.9  |  |  |  |  |  |  |  |  |
|                     | 4          | 0.01                                                             | 2.1  | 1.6  | 1.0  | 0.6  | 0.2  | 0.2  | 0.1                   | 39.7  | 35.1  | 36.5  | 34.6  | 31.7  | 29.6  | 28.6                  | 184.5 | 173.6 | 177.6 | 172.5 | 167.3 | 163.3 | 162.1 |  |  |  |  |  |  |  |  |
|                     | 4          | 0.001                                                            | 1.9  | 1.2  | 0.9  | 0.5  | 0.2  | 0.1  | 0.1                   | 140.7 | 137.9 | 136.5 | 132.9 | 122.6 | 112.8 | 103.9                 | 292.1 | 287.0 | 284.0 | 282.1 | 272.9 | 263.0 | 255.6 |  |  |  |  |  |  |  |  |
|                     | 6          | 0.1                                                              | 4.2  | 3.2  | 2.4  | 1.3  | 0.6  | 0.5  | 0.3                   | 14.1  | 8.5   | 6.6   | 3.6   | 1.8   | 1.5   | 1.4                   | 119.4 | 102.6 | 98.6  | 98.0  | 93.1  | 92.0  | 90.9  |  |  |  |  |  |  |  |  |
|                     | 6          | 0.01                                                             | 1.9  | 1.5  | 1.2  | 0.6  | 0.2  | 0.2  | 0.1                   | 40.5  | 37.8  | 34.1  | 31.9  | 28.0  | 26.4  | 25.1                  | 183.2 | 179.1 | 174.7 | 170.6 | 162.2 | 159.0 | 158.6 |  |  |  |  |  |  |  |  |
|                     | 6          | 0.001                                                            | 1.7  | 1.3  | 0.9  | 0.4  | 0.2  | 0.1  | 0.1                   | 140.9 | 136.9 | 137.2 | 133.0 | 119.7 | 111.2 | 102.5                 | 291.5 | 286.1 | 285.6 | 278.9 | 270.0 | 262.0 | 255.5 |  |  |  |  |  |  |  |  |
|                     | 8          | 0.1                                                              | 4.2  | 3.1  | 2.4  | 1.2  | 0.6  | 0.4  | 0.4                   | 13.3  | 8.9   | 7.4   | 3.8   | 1.9   | 1.5   | 1.1                   | 117.3 | 103.8 | 106.4 | 97.7  | 93.2  | 89.8  | 91.7  |  |  |  |  |  |  |  |  |
|                     | 8          | 0.01                                                             | 2.3  | 1.6  | 1.1  | 0.6  | 0.2  | 0.2  | 0.1                   | 38.5  | 37.4  | 35.5  | 30.9  | 26.6  | 24.3  | 23.1                  | 182.3 | 183.0 | 179.3 | 168.6 | 161.5 | 157.0 | 155.6 |  |  |  |  |  |  |  |  |
|                     | 8          | 0.001                                                            | 1.9  | 1.2  | 1.0  | 0.5  | 0.2  | 0.1  | 0.1                   | 141.6 | 137.5 | 137.9 | 132.3 | 119.9 | 110.2 | 101.0                 | 293.2 | 284.9 | 285.3 | 282.1 | 269.7 | 260.6 | 253.6 |  |  |  |  |  |  |  |  |
