# Supplementary material for: Propensity score adjustment using machine learning classification algorithms to control selection bias in online surveys
Source: PubMed Central journal article supplement (PMC7176094; doi:10.1371/journal.pone.0231500), 2020-04-22
Supplement: pone.0231500.s007.pdf [file pone.0231500.s007.pdf]

S7 Table. Bias on the estimation of vote intention with unequal selection probabilities for the convenience sample based on the logistic formula with a sine transformation.

| Method              | Parameters | Convenience (Internet) sample sizes, in thousands of respondents |      |      |      |      |      |                       |      |      |      |      |      |                       |      |      |      |      |      |      |      |      |      |
|---------------------|------------|------------------------------------------------------------------|------|------|------|------|------|-----------------------|------|------|------|------|------|-----------------------|------|------|------|------|------|------|------|------|------|
|                     |            | Estimates for Party 1                                            |      |      |      |      |      | Estimates for Party 2 |      |      |      |      |      | Estimates for Party 3 |      |      |      |      |      |      |      |      |      |
|                     |            | 0.5                                                              | 0.75 | 1    | 2    | 5    | 7.5  | 10                    | 0.5  | 0.75 | 1    | 2    | 5    | 7.5                   | 10   | 0.5  | 0.75 | 1    | 2    | 5    | 7.5  | 10   |      |
| No adjustment       |            | -0.2                                                             | -0.3 | -0.2 | -0.1 | -0.2 | -0.2 | -0.2                  | -7.3 | -7.4 | -7.3 | -7.2 | -7.1 | -6.9                  | -6.7 | 14.5 | 14.7 | 14.5 | 14.4 | 14.3 | 14.2 | 14.1 |      |
| Logistic regression |            | -0.1                                                             | -0.2 | -0.2 | 0.0  | -0.1 | -0.1 | -0.1                  | -0.6 | -0.6 | -0.4 | -0.3 | -0.2 | -0.1                  | -0.2 | 10.2 | 10.3 | 10.0 | 10.0 | 9.9  | 9.9  | 9.9  |      |
| C4.5                | M          |                                                                  |      |      |      |      |      |                       |      |      |      |      |      |                       |      |      |      |      |      |      |      |      |      |
|                     | CP         |                                                                  |      |      |      |      |      |                       |      |      |      |      |      |                       |      |      |      |      |      |      |      |      |      |
|                     | 0.005      | 0.1                                                              | -0.2 | -0.1 | -0.1 | -0.2 | -0.2 | -0.2                  | -0.2 | -2.8 | -2.9 | -3.1 | -6.9 | -7.0                  | -6.9 | -6.7 | 11.2 | 11.0 | 11.1 | 14.2 | 14.3 | 14.2 | 14.1 |
|                     | 0.005      | 0.25                                                             | -0.1 | -0.1 | -0.2 | -0.1 | -0.2 | -0.2                  | -0.2 | -2.2 | -2.8 | -2.6 | -6.1 | -7.0                  | -6.9 | -6.7 | 10.8 | 10.9 | 10.7 | 13.5 | 14.3 | 14.2 | 14.1 |
|                     | 0.005      | 0.5                                                              | 0.0  | -0.2 | 0.2  | -0.2 | -0.2 | -0.2                  | -0.2 | -1.4 | -2.1 | -2.1 | -4.0 | -7.0                  | -6.9 | -6.7 | 10.3 | 10.7 | 10.3 | 11.9 | 14.3 | 14.2 | 14.1 |
|                     | 0.01       | 0.1                                                              | -0.2 | -0.2 | -0.1 | -0.2 | -0.2 | -0.2                  | -0.2 | -2.8 | -3.0 | -3.0 | -7.0 | -7.0                  | -6.8 | -6.7 | 11.0 | 11.0 | 11.0 | 14.3 | 14.3 | 14.2 | 14.1 |
|                     | 0.01       | 0.25                                                             | -0.3 | -0.2 | -0.1 | -0.1 | -0.2 | -0.2                  | -0.2 | -2.0 | -2.8 | -2.9 | -6.5 | -7.0                  | -6.9 | -6.7 | 10.7 | 10.9 | 10.9 | 13.8 | 14.3 | 14.2 | 14.1 |
|                     | 0.01       | 0.5                                                              | -0.1 | -0.3 | -0.1 | -0.2 | -0.2 | -0.2                  | -0.2 | -1.5 | -2.0 | -2.4 | -4.9 | -7.0                  | -6.9 | -6.7 | 10.1 | 10.5 | 10.7 | 12.6 | 14.3 | 14.2 | 14.1 |
| 0.05                | 0.1        | -0.1                                                             | -0.2 | -0.1 | -0.2 | -0.2 | -0.2 | -0.2                  | -3.0 | -3.0 | -3.0 | -7.1 | -7.1 | -6.9                  | -6.7 | 11.3 | 11.0 | 11.0 | 14.3 | 14.3 | 14.2 | 14.1 |      |
| 0.05                | 0.25       | -0.1                                                             | -0.2 | -0.2 | -0.2 | -0.2 | -0.2 | -0.2                  | -2.3 | -2.9 | -2.9 | -7.0 | -7.0 | -6.9                  | -6.7 | 10.8 | 11.1 | 10.9 | 14.3 | 14.3 | 14.2 | 14.1 |      |
| 0.05                | 0.5        | -0.1                                                             | -0.2 | -0.1 | -0.2 | -0.1 | -0.2 | -0.2                  | -1.8 | -2.5 | -2.8 | -6.6 | -7.0 | -6.9                  | -6.7 | 10.4 | 10.7 | 10.8 | 14.0 | 14.3 | 14.2 | 14.1 |      |
| C5.0                | M          |                                                                  |      |      |      |      |      |                       |      |      |      |      |      |                       |      |      |      |      |      |      |      |      |      |
|                     | CP         |                                                                  |      |      |      |      |      |                       |      |      |      |      |      |                       |      |      |      |      |      |      |      |      |      |
|                     | 0.005      | 0.1                                                              | -0.2 | -0.2 | -0.2 | -0.2 | -0.2 | -0.2                  | -0.2 | -2.7 | -3.2 | -4.0 | -7.3 | -7.0                  | -6.9 | -6.7 | 11.1 | 11.4 | 11.8 | 14.5 | 14.3 | 14.2 | 14.1 |
|                     | 0.005      | 0.25                                                             | -0.2 | -0.2 | -0.2 | -0.2 | -0.2 | -0.2                  | -0.2 | -2.6 | -3.3 | -4.0 | -7.2 | -7.1                  | -6.9 | -6.7 | 11.1 | 11.6 | 11.9 | 14.4 | 14.3 | 14.2 | 14.1 |
|                     | 0.005      | 0.5                                                              | -0.3 | -0.2 | -0.1 | -0.2 | -0.2 | -0.2                  | -0.2 | -2.4 | -3.2 | -4.4 | -7.2 | -7.0                  | -6.9 | -6.7 | 10.8 | 11.2 | 12.1 | 14.3 | 14.3 | 14.2 | 14.1 |
|                     | 0.01       | 0.1                                                              | -0.3 | -0.1 | -0.1 | -0.2 | -0.2 | -0.2                  | -0.2 | -2.8 | -3.2 | -4.0 | -7.4 | -7.0                  | -6.9 | -6.7 | 11.1 | 11.3 | 11.7 | 14.6 | 14.3 | 14.2 | 14.1 |
|                     | 0.01       | 0.25                                                             | -0.2 | -0.1 | -0.2 | -0.2 | -0.2 | -0.2                  | -0.2 | -2.5 | -3.2 | -4.3 | -7.2 | -7.0                  | -6.9 | -6.7 | 10.9 | 11.3 | 12.0 | 14.4 | 14.4 | 14.2 | 14.1 |
|                     | 0.01       | 0.5                                                              | -0.1 | 0.0  | -0.1 | -0.2 | -0.2 | -0.2                  | -0.2 | -2.5 | -3.5 | -4.5 | -7.2 | -7.0                  | -6.9 | -6.7 | 10.8 | 11.5 | 12.2 | 14.4 | 14.3 | 14.2 | 14.1 |
| 0.05                | 0.1        | 0.0                                                              | -0.2 | -0.1 | -0.2 | -0.2 | -0.2 | -0.2                  | -2.8 | -3.2 | -4.0 | -7.1 | -7.1 | -6.9                  | -6.7 | 10.9 | 11.2 | 11.7 | 14.3 | 14.4 | 14.2 | 14.1 |      |
| 0.05                | 0.25       | -0.2                                                             | -0.2 | -0.2 | -0.2 | -0.2 | -0.2 | -0.2                  | -2.7 | -3.4 | -4.1 | -7.2 | -7.0 | -6.9                  | -6.7 | 11.0 | 11.5 | 11.9 | 14.4 | 14.3 | 14.3 | 14.1 |      |
| 0.05                | 0.5        | -0.3                                                             | -0.2 | -0.1 | -0.2 | -0.2 | -0.2 | -0.2                  | -2.8 | -3.5 | -4.2 | -7.3 | -7.0 | -6.9                  | -6.7 | 11.3 | 11.5 | 12.0 | 14.4 | 14.2 | 14.2 | 14.1 |      |
| CART                | M          |                                                                  |      |      |      |      |      |                       |      |      |      |      |      |                       |      |      |      |      |      |      |      |      |      |
|                     | CP         |                                                                  |      |      |      |      |      |                       |      |      |      |      |      |                       |      |      |      |      |      |      |      |      |      |
|                     | 0.005      | 0.1                                                              | -0.3 | -0.2 | -0.2 | -0.2 | -0.1 | -0.2                  | -0.2 | -2.4 | -4.1 | -6.9 | -7.3 | -7.1                  | -6.9 | -6.7 | 11.1 | 12.1 | 14.2 | 14.5 | 14.3 | 14.2 | 14.1 |
|                     | 0.005      | 0.25                                                             | -0.2 | -0.2 | -0.2 | -0.1 | -0.2 | -0.2                  | -0.2 | -7.2 | -7.2 | -7.2 | -7.2 | -7.0                  | -6.9 | -6.7 | 14.4 | 14.3 | 14.3 | 14.4 | 14.3 | 14.2 | 14.1 |
|                     | 0.005      | 0.5                                                              | -0.1 | -0.2 | -0.2 | -0.2 | -0.2 | -0.2                  | -0.2 | -7.4 | -7.4 | -7.3 | -7.3 | -7.0                  | -6.9 | -6.7 | 14.5 | 14.7 | 14.5 | 14.5 | 14.3 | 14.2 | 14.1 |
|                     | 0.01       | 0.1                                                              | -0.2 | -0.1 | -0.2 | -0.2 | -0.1 | -0.2                  | -0.2 | -2.5 | -4.3 | -6.9 | -7.3 | -7.1                  | -6.9 | -6.7 | 11.0 | 12.2 | 14.2 | 14.4 | 14.3 | 14.2 | 14.1 |
|                     | 0.01       | 0.25                                                             | -0.2 | -0.2 | -0.2 | -0.2 | -0.2 | -0.2                  | -0.2 | -7.3 | -7.2 | -7.1 | -7.2 | -7.1                  | -6.9 | -6.7 | 14.5 | 14.4 | 14.5 | 14.4 | 14.3 | 14.2 | 14.1 |
|                     | 0.01       | 0.5                                                              | -0.1 | -0.2 | -0.2 | -0.2 | -0.2 | -0.2                  | -0.2 | -7.2 | -7.3 | -7.3 | -7.2 | -7.0                  | -6.9 | -6.7 | 14.3 | 14.4 | 14.6 | 14.4 | 14.3 | 14.2 | 14.1 |
| 0.05                | 0.1        | -0.3                                                             | -0.2 | -0.2 | -0.2 | -0.2 | -0.2 | -0.2                  | -2.5 | -4.5 | -7.0 | -7.2 | -7.0 | -6.9                  | -6.7 | 11.0 | 12.3 | 14.3 | 14.4 | 14.3 | 14.2 | 14.1 |      |
| 0.05                | 0.25       | -0.2                                                             | -0.1 | -0.1 | -0.1 | -0.2 | -0.2 | -0.2                  | -7.2 | -7.1 | -7.2 | -7.2 | -7.1 | -6.9                  | -6.7 | 14.4 | 14.2 | 14.3 | 14.4 | 14.3 | 14.2 | 14.1 |      |
| 0.05                | 0.5        | -0.3                                                             | -0.1 | -0.2 | -0.1 | -0.2 | -0.2 | -0.2                  | -7.3 | -7.4 | -7.3 | -7.3 | -7.0 | -6.9                  | -6.7 | 14.5 | 14.6 | 14.4 | 14.5 | 14.3 | 14.2 | 14.1 |      |
| k-NN                | K          |                                                                  |      |      |      |      |      |                       |      |      |      |      |      |                       |      |      |      |      |      |      |      |      |      |
|                     | 3          | -0.1                                                             | -0.2 | -0.1 | -0.1 | -0.1 | -0.1 | -0.1                  | -1.2 | -0.6 | -0.2 | 0.2  | 0.2  | 0.3                   | 0.2  | 10.3 | 9.9  | 9.7  | 9.3  | 9.3  | 9.2  | 9.3  |      |
|                     | 5          | -0.2                                                             | -0.2 | -0.1 | -0.2 | -0.1 | -0.1 | -0.1                  | -0.3 | 0.1  | 0.2  | 0.5  | 0.4  | 0.3                   | 0.4  | 9.9  | 9.5  | 9.2  | 9.2  | 9.2  | 9.2  | 9.1  |      |
|                     | 7          | -0.1                                                             | -0.1 | -0.2 | -0.1 | -0.2 | -0.2 | -0.1                  | 0.1  | 0.2  | 0.2  | 0.4  | 0.5  | 0.4                   | 0.5  | 9.3  | 9.3  | 9.4  | 9.1  | 9.1  | 9.2  | 9.1  |      |
|                     | 9          | -0.1                                                             | -0.4 | -0.2 | -0.2 | -0.1 | -0.1 | -0.1                  | 0.0  | 0.3  | 0.4  | 0.5  | 0.6  | 0.4                   | 0.4  | 9.4  | 9.4  | 9.3  | 9.1  | 9.0  | 9.2  | 9.2  |      |
|                     | 11         | -0.1                                                             | -0.1 | -0.2 | -0.2 | -0.1 | -0.2 | -0.1                  | 0.3  | 0.2  | 0.4  | 0.3  | 0.5  | 0.4                   | 0.4  | 9.1  | 9.3  | 9.2  | 9.3  | 9.1  | 9.2  | 9.2  |      |
| 13                  | -0.1       | -0.2                                                             | -0.1 | -0.1 | -0.1 | -0.2 | -0.1 | 0.0                   | 0.4  | 0.4  | 0.5  | 0.4  | 0.4  | 0.4                   | 9.4  | 9.1  | 9.2  | 9.1  | 9.1  | 9.1  | 9.2  |      |      |
| Naive Bayes         | laplace    |                                                                  |      |      |      |      |      |                       |      |      |      |      |      |                       |      |      |      |      |      |      |      |      |      |
|                     | 0          | 0.0                                                              | -0.1 | -0.1 | 0.0  | -0.1 | -0.1 | -0.1                  | 1.4  | 1.4  | 1.4  | 1.4  | 1.3  | 1.1                   | 0.9  | 8.1  | 8.2  | 8.2  | 8.1  | 8.3  | 8.4  | 8.6  |      |
|                     | 1          | -0.1                                                             | -0.1 | -0.1 | -0.1 | -0.1 | -0.1 | -0.1                  | 1.7  | 1.4  | 1.5  | 1.4  | 1.1  | 1.1                   | 0.9  | 7.9  | 8.0  | 7.9  | 8.2  | 8.4  | 8.5  | 8.6  |      |
|                     | 2          | -0.1                                                             | 0.0  | 0.0  | -0.1 | -0.1 | -0.1 | -0.1                  | 1.5  | 1.6  | 1.6  | 1.5  | 1.2  | 1.1                   | 1.0  | 8.1  | 8.0  | 8.0  | 8.2  | 8.4  | 8.5  | 8.6  |      |
|                     | 5          | -0.1                                                             | 0.0  | -0.1 | -0.1 | -0.1 | -0.1 | -0.1                  | 1.8  | 1.8  | 1.6  | 1.4  | 1.1  | 1.0                   | 0.8  | 8.0  | 8.0  | 8.1  | 8.1  | 8.4  | 8.5  | 8.6  |      |
| 10                  | -0.1       | -0.1                                                             | -0.1 | -0.1 | -0.1 | -0.1 | -0.1 | 1.6                   | 1.6  | 1.8  | 1.2  | 1.1  | 0.8  | 0.7                   | 8.1  | 8.1  | 7.9  | 8.3  | 8.4  | 8.6  | 8.7  |      |      |
| Random Forest       | mtry       |                                                                  |      |      |      |      |      |                       |      |      |      |      |      |                       |      |      |      |      |      |      |      |      |      |
|                     | 1          | -0.1                                                             | 0.1  | 0.1  | 0.3  | 0.3  | 0.1  | -0.1                  | 5.7  | 9.6  | 9.7  | 1.4  | 0.8  | -0.3                  | -2.2 | 5.1  | 1.7  | 1.1  | 6.6  | 8.4  | 9.7  | 11.2 |      |
|                     | 2          | -0.3                                                             | 0.3  | 0.2  | 0.3  | 0.4  | 0.0  | 0.0                   | 9.7  | 11.0 | 10.6 | 6.3  | 4.5  | 3.4                   | 1.9  | 2.4  | 0.5  | 0.5  | 3.5  | 5.1  | 6.5  | 7.4  |      |
|                     | 4          | -0.4                                                             | 0.0  | 0.0  | 0.1  | 0.2  | 0.0  | -0.1                  | 1.6  | 2.9  | 4.1  | 7.1  | 9.2  | 6.5                   | 4.6  | 8.7  | 7.5  | 6.5  | 3.6  | 0.9  | 3.0  | 4.9  |      |
| GBM                 | ID         |                                                                  |      |      |      |      |      |                       |      |      |      |      |      |                       |      |      |      |      |      |      |      |      |      |
|                     | LR         |                                                                  |      |      |      |      |      |                       |      |      |      |      |      |                       |      |      |      |      |      |      |      |      |      |
|                     | 4          | 0.1                                                              | -0.1 | -0.2 | -0.1 | -0.1 | -0.1 | -0.1                  | -0.1 | -0.4 | -0.1 | -0.2 | -0.1 | -0.1                  | -0.1 | -0.1 | 9.7  | 9.6  | 9.5  | 9.4  | 9.5  | 9.5  | 9.5  |
|                     | 4          | 0.01                                                             | -0.2 | -0.2 | -0.2 | -0.2 | -0.2 | -0.2                  | -0.1 | -3.3 | -3.4 | -3.3 | -3.3 | -3.4                  | -3.3 | -3.4 | 11.8 | 11.8 | 11.8 | 11.6 | 11.7 | 11.7 | 11.6 |
|                     | 4          | 0.001                                                            | -0.1 | -0.1 | -0.2 | -0.1 | -0.2 | -0.2                  | -0.2 | -6.7 | -6.7 | -6.7 | -6.7 | -6.5                  | -6.4 | -6.3 | 14.1 | 14.0 | 14.0 | 14.1 | 13.9 | 13.9 | 13.8 |
|                     | 6          | 0.1                                                              | 0.0  | -0.1 | 0.1  | -0.1 | -0.1 | 0.0                   | -0.1 | -0.3 | -0.3 | -0.3 | -0.3 | 0.0                   | -0.1 | 0.0  | 9.5  | 9.7  | 9.6  | 9.6  | 9.5  | 9.5  | 9.5  |
|                     | 6          | 0.01                                                             | -0.1 | -0.1 | -0.1 | -0.2 | -0.2 | -0.2                  | -0.2 | -3.5 | -3.3 | -3.2 | -3.2 | -3.1                  | -3.2 | -3.1 | 11.9 | 11.7 | 11.7 | 11.6 | 11.5 | 11.6 | 11.5 |
|                     | 6          | 0.001                                                            | -0.2 | -0.2 | -0.2 | -0.2 | -0.2 | -0.2                  | -0.2 | -6.7 | -6.7 | -6.8 | -6.7 | -6.5                  | -6.4 | -6.2 | 14.1 | 14.1 | 14.0 | 14.1 | 13.9 | 13.8 | 13.8 |
|                     | 8          | 0.1                                                              | -0.2 | 0.0  | 0.0  | 0.0  | -0.1 | -0.1                  | -0.1 | -0.5 | -0.4 | -0.3 | 0.0  | 0.0                   | 0.0  | -0.1 | 9.7  | 9.7  | 9.7  | 9.4  | 9.6  | 9.5  | 9.5  |
|                     | 8          | 0.01                                                             | -0.2 | -0.2 | -0.2 | -0.1 | -0.1 | -0.2                  | -0.2 | -3.2 | -3.3 | -3.3 | -3.1 | -3.0                  | -3.0 | -3.0 | 11.9 | 11.8 | 11.7 | 11.6 | 11.5 | 11.5 | 11.5 |
| 8                   | 0.001      | -0.2                                                             | -0.2 | -0.1 | -0.2 | -0.2 | -0.2 | -0.2                  | -6.6 | -6.7 | -6.8 | -6.6 | -6.4 | -6.4                  | -6.2 | 14.1 | 14.1 | 14.1 | 14.1 | 13.9 | 13.8 | 13.7 |      |
