# Supplementary material for: Propensity score adjustment using machine learning classification algorithms to control selection bias in online surveys
Source: PubMed Central journal article supplement (PMC7176094; doi:10.1371/journal.pone.0231500), 2020-04-22
Supplement: pone.0231500.s008.pdf [file pone.0231500.s008.pdf]

S8 Table. Mean Square Error (MSE) on the estimation of vote intention with unequal selection probabilities for the convenience sample based on the logistic formula with a sine transformation.

| Method              |         | Parameters |      | Convenience (Internet) sample sizes, in thousands of respondents |      |      |      |      |      |       |                       |       |      |       |      |       |       |                       |       |       |       |       |       |       |  |  |  |  |  |  |  |  |  |
|---------------------|---------|------------|------|------------------------------------------------------------------|------|------|------|------|------|-------|-----------------------|-------|------|-------|------|-------|-------|-----------------------|-------|-------|-------|-------|-------|-------|--|--|--|--|--|--|--|--|--|
|                     |         |            |      | Estimates for Party 1                                            |      |      |      |      |      |       | Estimates for Party 2 |       |      |       |      |       |       | Estimates for Party 3 |       |       |       |       |       |       |  |  |  |  |  |  |  |  |  |
|                     |         |            |      | 0.5                                                              | 0.75 | 1    | 2    | 5    | 7.5  | 10    | 0.5                   | 0.75  | 1    | 2     | 5    | 7.5   | 10    | 0.5                   | 0.75  | 1     | 2     | 5     | 7.5   | 10    |  |  |  |  |  |  |  |  |  |
| No adjustment       |         | 1.8        | 1.3  | 0.9                                                              | 0.4  | 0.2  | 0.1  | 0.1  | 58.0 | 57.5  | 55.3                  | 52.7  | 50.1 | 47.6  | 45.1 | 215.7 | 218.5 | 211.6                 | 208.9 | 205.4 | 202.7 | 199.7 |       |       |  |  |  |  |  |  |  |  |  |
| Logistic regression |         | 2.9        | 2.0  | 1.4                                                              | 0.9  | 0.5  | 0.3  | 0.3  | 7.5  | 5.7   | 4.0                   | 1.9   | 1.1  | 1.0   | 0.8  | 111.4 | 110.9 | 104.2                 | 101.1 | 98.6  | 98.7  | 98.8  |       |       |  |  |  |  |  |  |  |  |  |
| C4.5                | M       | CP         | 2.8  | 2.1                                                              | 1.4  | 0.7  | 0.2  | 0.1  | 0.1  | 16.3  | 13.7                  | 15.6  | 50.4 | 49.6  | 47.3 | 45.1  | 134.0 | 127.2                 | 127.2 | 203.7 | 205.0 | 201.4 | 198.5 |       |  |  |  |  |  |  |  |  |  |
|                     | 0.005   | 0.1        | 3.2  | 2.2                                                              | 1.7  | 0.8  | 0.2  | 0.1  | 0.1  | 13.6  | 13.6                  | 11.0  | 43.2 | 49.6  | 47.7 | 45.4  | 124.1 | 123.6                 | 119.5 | 185.9 | 204.3 | 202.4 | 199.5 |       |  |  |  |  |  |  |  |  |  |
|                     | 0.005   | 0.25       | 3.6  | 2.3                                                              | 2.1  | 0.8  | 0.2  | 0.1  | 0.1  | 10.9  | 11.1                  | 10.1  | 23.7 | 49.7  | 47.4 | 44.8  | 114.6 | 120.0                 | 111.3 | 147.1 | 204.8 | 202.0 | 197.8 |       |  |  |  |  |  |  |  |  |  |
|                     | 0.01    | 0.1        | 2.7  | 2.1                                                              | 1.5  | 0.6  | 0.2  | 0.1  | 0.1  | 15.3  | 14.3                  | 14.2  | 51.8 | 50.0  | 47.1 | 45.1  | 128.2 | 127.3                 | 125.6 | 206.1 | 206.2 | 201.3 | 199.3 |       |  |  |  |  |  |  |  |  |  |
|                     | 0.01    | 0.25       | 3.5  | 2.0                                                              | 1.6  | 0.7  | 0.2  | 0.1  | 0.1  | 12.0  | 13.2                  | 12.5  | 47.1 | 50.0  | 47.4 | 45.3  | 122.4 | 124.9                 | 122.2 | 194.2 | 205.3 | 200.7 | 199.5 |       |  |  |  |  |  |  |  |  |  |
|                     | 0.01    | 0.5        | 3.4  | 2.3                                                              | 1.7  | 0.7  | 0.2  | 0.1  | 0.1  | 12.0  | 10.4                  | 10.6  | 32.0 | 49.6  | 47.5 | 45.0  | 113.1 | 115.5                 | 118.9 | 162.8 | 204.8 | 201.3 | 199.2 |       |  |  |  |  |  |  |  |  |  |
|                     | 0.05    | 0.1        | 3.0  | 1.8                                                              | 1.6  | 0.4  | 0.2  | 0.1  | 0.1  | 16.5  | 13.5                  | 14.1  | 52.0 | 50.4  | 47.2 | 45.2  | 135.4 | 125.6                 | 124.4 | 206.9 | 204.4 | 201.8 | 199.2 |       |  |  |  |  |  |  |  |  |  |
|                     | 0.05    | 0.25       | 2.8  | 2.0                                                              | 1.5  | 0.5  | 0.2  | 0.1  | 0.1  | 13.9  | 13.9                  | 13.7  | 51.2 | 49.9  | 47.4 | 45.5  | 125.9 | 126.7                 | 123.8 | 206.6 | 205.1 | 202.6 | 199.1 |       |  |  |  |  |  |  |  |  |  |
|                     | 0.05    | 0.5        | 3.3  | 1.8                                                              | 1.5  | 0.5  | 0.2  | 0.1  | 0.1  | 11.4  | 11.7                  | 11.5  | 47.5 | 49.8  | 47.4 | 45.1  | 116.4 | 118.7                 | 119.5 | 199.7 | 204.3 | 201.5 | 199.5 |       |  |  |  |  |  |  |  |  |  |
|                     | C5.0    | M          | CP   | 2.6                                                              | 1.9  | 1.3  | 0.5  | 0.2  | 0.1  | 0.1   | 14.0                  | 16.2  | 23.9 | 54.2  | 49.3 | 48.2  | 45.7  | 130.7                 | 135.2 | 144.9 | 211.2 | 205.4 | 202.4 | 199.9 |  |  |  |  |  |  |  |  |  |
| 0.005               |         | 0.1        | 3.0  | 1.9                                                              | 1.3  | 0.5  | 0.2  | 0.1  | 0.1  | 14.6  | 17.7                  | 24.7  | 53.6 | 50.4  | 47.6 | 45.7  | 130.2 | 139.3                 | 146.9 | 208.1 | 205.8 | 201.3 | 200.2 |       |  |  |  |  |  |  |  |  |  |
| 0.005               |         | 0.25       | 3.1  | 1.8                                                              | 1.4  | 0.5  | 0.2  | 0.1  | 0.1  | 13.0  | 18.7                  | 28.5  | 54.2 | 49.0  | 47.6 | 45.4  | 123.6 | 132.0                 | 154.3 | 206.6 | 204.0 | 203.2 | 199.7 |       |  |  |  |  |  |  |  |  |  |
| 0.01                |         | 0.1        | 2.8  | 1.9                                                              | 1.5  | 0.5  | 0.2  | 0.1  | 0.1  | 15.2  | 16.2                  | 24.2  | 55.8 | 49.4  | 47.8 | 44.9  | 130.9 | 132.3                 | 143.5 | 213.2 | 203.7 | 202.9 | 199.3 |       |  |  |  |  |  |  |  |  |  |
| 0.01                |         | 0.25       | 2.7  | 1.8                                                              | 1.2  | 0.5  | 0.2  | 0.1  | 0.1  | 13.8  | 17.8                  | 27.5  | 53.2 | 49.9  | 47.6 | 45.2  | 127.0 | 133.6                 | 150.4 | 208.5 | 206.6 | 202.8 | 199.3 |       |  |  |  |  |  |  |  |  |  |
| 0.01                |         | 0.5        | 3.0  | 2.0                                                              | 1.3  | 0.5  | 0.2  | 0.1  | 0.1  | 14.7  | 19.9                  | 29.5  | 53.3 | 49.8  | 47.8 | 45.5  | 125.4 | 138.5                 | 154.7 | 208.2 | 205.3 | 203.1 | 199.6 |       |  |  |  |  |  |  |  |  |  |
| 0.05                |         | 0.1        | 3.3  | 1.8                                                              | 1.3  | 0.5  | 0.2  | 0.1  | 0.1  | 14.9  | 16.1                  | 23.6  | 51.6 | 50.3  | 47.8 | 45.6  | 126.8 | 130.0                 | 142.4 | 206.1 | 206.5 | 201.1 | 200.1 |       |  |  |  |  |  |  |  |  |  |
| 0.05                |         | 0.25       | 2.9  | 1.8                                                              | 1.3  | 0.5  | 0.2  | 0.1  | 0.1  | 14.8  | 17.7                  | 25.3  | 52.7 | 50.0  | 48.1 | 45.5  | 128.4 | 138.1                 | 147.0 | 209.0 | 204.7 | 203.4 | 199.6 |       |  |  |  |  |  |  |  |  |  |
| 0.05                |         | 0.5        | 2.9  | 1.9                                                              | 1.2  | 0.5  | 0.2  | 0.1  | 0.1  | 16.0  | 18.4                  | 26.2  | 53.8 | 49.6  | 47.5 | 45.2  | 134.0 | 138.7                 | 150.8 | 209.4 | 203.3 | 202.1 | 198.7 |       |  |  |  |  |  |  |  |  |  |
| CART                |         | M          | CP   | 2.5                                                              | 1.5  | 1.0  | 0.5  | 0.2  | 0.1  | 0.1   | 12.0                  | 26.5  | 51.5 | 54.7  | 50.3 | 47.5  | 45.4  | 130.0                 | 153.6 | 205.7 | 211.9 | 203.9 | 202.5 | 199.1 |  |  |  |  |  |  |  |  |  |
|                     | 0.005   | 0.1        | 1.8  | 1.2                                                              | 0.9  | 0.4  | 0.2  | 0.1  | 0.1  | 56.6  | 53.9                  | 53.9  | 52.8 | 49.8  | 47.7 | 45.1  | 211.7 | 208.8                 | 208.1 | 207.6 | 205.4 | 202.1 | 199.0 |       |  |  |  |  |  |  |  |  |  |
|                     | 0.005   | 0.25       | 1.8  | 1.3                                                              | 1.0  | 0.5  | 0.2  | 0.1  | 0.1  | 58.4  | 58.1                  | 55.2  | 53.8 | 50.0  | 48.2 | 45.4  | 216.1 | 217.9                 | 212.6 | 211.2 | 206.1 | 202.6 | 199.3 |       |  |  |  |  |  |  |  |  |  |
|                     | 0.01    | 0.1        | 2.4  | 1.3                                                              | 1.1  | 0.4  | 0.2  | 0.1  | 0.1  | 12.6  | 28.3                  | 51.6  | 53.7 | 50.2  | 47.1 | 45.1  | 126.9 | 156.5                 | 205.7 | 209.2 | 205.5 | 200.5 | 199.2 |       |  |  |  |  |  |  |  |  |  |
|                     | 0.01    | 0.25       | 2.0  | 1.2                                                              | 1.0  | 0.4  | 0.2  | 0.1  | 0.1  | 58.6  | 55.2                  | 53.0  | 52.4 | 50.2  | 47.6 | 45.3  | 214.8 | 210.9                 | 211.4 | 208.0 | 205.2 | 202.7 | 199.5 |       |  |  |  |  |  |  |  |  |  |
|                     | 0.01    | 0.5        | 1.8  | 1.3                                                              | 1.0  | 0.5  | 0.2  | 0.1  | 0.1  | 56.7  | 55.9                  | 55.4  | 52.4 | 49.9  | 47.8 | 45.1  | 210.2 | 210.4                 | 214.4 | 208.3 | 204.2 | 201.7 | 199.2 |       |  |  |  |  |  |  |  |  |  |
|                     | 0.05    | 0.1        | 2.6  | 1.4                                                              | 0.9  | 0.5  | 0.2  | 0.1  | 0.1  | 12.7  | 30.3                  | 52.1  | 53.0 | 49.5  | 47.5 | 45.7  | 128.2 | 157.7                 | 206.5 | 209.1 | 205.1 | 202.2 | 199.8 |       |  |  |  |  |  |  |  |  |  |
|                     | 0.05    | 0.25       | 1.8  | 1.1                                                              | 0.8  | 0.4  | 0.2  | 0.1  | 0.1  | 55.7  | 52.9                  | 54.4  | 52.7 | 50.1  | 47.5 | 45.4  | 212.8 | 205.8                 | 208.1 | 207.9 | 206.2 | 201.7 | 199.9 |       |  |  |  |  |  |  |  |  |  |
|                     | 0.05    | 0.5        | 1.8  | 1.1                                                              | 0.9  | 0.4  | 0.2  | 0.1  | 0.1  | 57.7  | 52.7                  | 55.0  | 54.1 | 49.8  | 47.8 | 44.9  | 215.1 | 214.9                 | 210.8 | 210.8 | 205.4 | 202.9 | 199.4 |       |  |  |  |  |  |  |  |  |  |
|                     | k-NN    | k          |      | 3.9                                                              | 2.9  | 2.2  | 1.3  | 0.6  | 0.5  | 0.4   | 11.4                  | 8.1   | 6.4  | 3.8   | 1.9  | 1.6   | 1.4   | 116.6                 | 104.5 | 100.2 | 89.6  | 87.7  | 85.4  | 87.1  |  |  |  |  |  |  |  |  |  |
| 3                   |         |            | 3.4  | 2.7                                                              | 2.2  | 1.2  | 0.6  | 0.5  | 0.4  | 9.9   | 7.1                   | 6.3   | 3.7  | 1.9   | 1.7  | 1.5   | 105.9 | 97.3                  | 90.5  | 86.7  | 85.0  | 86.3  | 84.4  |       |  |  |  |  |  |  |  |  |  |
| 5                   |         |            | 3.1  | 2.4                                                              | 2.1  | 0.9  | 0.6  | 0.5  | 0.4  | 9.6   | 7.3                   | 5.6   | 3.3  | 2.1   | 1.4  | 1.5   | 94.7  | 91.8                  | 92.3  | 86.0  | 83.8  | 85.4  | 83.8  |       |  |  |  |  |  |  |  |  |  |
| 7                   |         |            | 3.3  | 2.3                                                              | 1.6  | 1.1  | 0.5  | 0.4  | 0.4  | 8.5   | 6.8                   | 5.5   | 3.1  | 2.0   | 1.6  | 1.3   | 96.9  | 93.3                  | 90.1  | 84.7  | 81.9  | 85.5  | 85.5  |       |  |  |  |  |  |  |  |  |  |
| 9                   |         |            | 3.2  | 2.1                                                              | 1.6  | 0.9  | 0.5  | 0.4  | 0.3  | 9.0   | 6.6                   | 5.2   | 2.9  | 2.0   | 1.4  | 1.5   | 91.2  | 91.1                  | 88.7  | 89.3  | 84.2  | 85.3  | 85.3  |       |  |  |  |  |  |  |  |  |  |
| 11                  |         |            | 3.6  | 1.9                                                              | 1.5  | 0.9  | 0.5  | 0.4  | 0.4  | 9.4   | 6.8                   | 4.9   | 2.7  | 1.8   | 1.6  | 1.4   | 94.8  | 88.4                  | 88.9  | 84.7  | 84.5  | 84.0  | 84.9  |       |  |  |  |  |  |  |  |  |  |
| 13                  |         |            |      |                                                                  |      |      |      |      |      |       |                       |       |      |       |      |       |       |                       |       |       |       |       |       |       |  |  |  |  |  |  |  |  |  |
| Naive Bayes         | laplace |            | 5.7  | 3.0                                                              | 2.2  | 1.2  | 0.5  | 0.4  | 0.4  | 15.6  | 11.1                  | 8.2   | 5.6  | 3.8   | 2.9  | 2.0   | 75.6  | 75.1                  | 71.7  | 69.0  | 70.4  | 71.8  | 75.3  |       |  |  |  |  |  |  |  |  |  |
|                     | 0       |            | 3.9  | 3.3                                                              | 2.1  | 1.1  | 0.5  | 0.4  | 0.4  | 15.2  | 10.1                  | 9.1   | 5.3  | 2.9   | 2.7  | 2.2   | 72.8  | 71.4                  | 68.5  | 69.9  | 71.7  | 72.5  | 75.4  |       |  |  |  |  |  |  |  |  |  |
|                     | 1       |            | 5.1  | 2.5                                                              | 2.3  | 1.2  | 0.5  | 0.4  | 0.3  | 14.8  | 10.4                  | 8.4   | 5.9  | 3.4   | 2.7  | 2.3   | 76.5  | 70.4                  | 68.8  | 69.2  | 71.2  | 72.7  | 74.4  |       |  |  |  |  |  |  |  |  |  |
|                     | 2       |            | 5.1  | 2.8                                                              | 2.0  | 1.1  | 0.5  | 0.4  | 0.3  | 16.7  | 11.1                  | 8.7   | 5.6  | 3.0   | 2.5  | 2.0   | 74.3  | 70.1                  | 70.6  | 69.2  | 71.3  | 73.9  | 75.2  |       |  |  |  |  |  |  |  |  |  |
|                     | 5       |            | 4.3  | 3.0                                                              | 2.2  | 1.3  | 0.5  | 0.4  | 0.3  | 17.0  | 10.7                  | 9.7   | 4.8  | 2.9   | 2.3  | 1.8   | 74.7  | 72.0                  | 67.7  | 72.2  | 72.2  | 75.6  | 77.1  |       |  |  |  |  |  |  |  |  |  |
| Random Forest       | mtry    |            | 11.0 | 9.0                                                              | 7.6  | 13.2 | 8.0  | 3.8  | 2.2  | 49.4  | 112.1                 | 117.0 | 42.7 | 21.4  | 12.1 | 11.6  | 38.9  | 19.6                  | 21.4  | 82.3  | 89.3  | 104.8 | 130.2 |       |  |  |  |  |  |  |  |  |  |
|                     | 1       |            | 13.7 | 11.8                                                             | 10.5 | 9.4  | 9.6  | 7.2  | 5.8  | 133.6 | 149.3                 | 137.1 | 63.4 | 44.2  | 31.1 | 19.5  | 34.7  | 19.2                  | 18.3  | 33.6  | 44.7  | 59.4  | 69.0  |       |  |  |  |  |  |  |  |  |  |
|                     | 2       |            | 27.5 | 23.8                                                             | 15.6 | 10.7 | 10.1 | 12.5 | 11.1 | 87.5  | 72.1                  | 80.1  | 86.8 | 115.8 | 76.5 | 51.2  | 144.0 | 107.8                 | 94.2  | 41.5  | 25.8  | 35.6  | 49.2  |       |  |  |  |  |  |  |  |  |  |
| GBM                 | ID      | LR         | 2.7  | 2.4                                                              | 1.6  | 1.0  | 0.4  | 0.3  | 0.3  | 9.1   | 6.0                   | 4.6   | 2.7  | 1.4   | 1.2  | 1.1   | 101.8 | 98.5                  | 94.6  | 90.4  | 91.2  | 91.0  | 90.7  |       |  |  |  |  |  |  |  |  |  |
|                     | 4       | 0.1        | 1.8  | 1.4                                                              | 1.1  | 0.5  | 0.2  | 0.1  | 0.1  | 16.5  | 14.5                  | 13.8  | 12.1 | 12.0  | 11.7 | 11.7  | 143.7 | 143.2                 | 142.8 | 136.0 | 137.4 | 136.9 | 135.8 |       |  |  |  |  |  |  |  |  |  |
|                     | 4       | 0.001      | 1.7  | 1.2                                                              | 0.9  | 0.4  | 0.2  | 0.1  | 0.1  | 49.8  | 48.1                  | 46.9  | 46.2 | 43.2  | 41.2 | 39.5  | 202.4 | 199.3                 | 199.4 | 198.8 | 194.5 | 193.1 | 189.5 |       |  |  |  |  |  |  |  |  |  |
|                     | 4       | 0.1        | 3.6  | 2.3                                                              | 1.8  | 1.1  | 0.5  | 0.4  | 0.3  | 8.8   | 6.3                   | 4.5   | 2.7  | 1.6   | 1.3  | 1.2   | 98.9  | 100.8                 | 96.0  | 94.0  | 91.3  | 90.5  | 90.4  |       |  |  |  |  |  |  |  |  |  |
|                     | 6       | 0.01       | 1.8  | 1.3                                                              | 0.9  | 0.5  | 0.2  | 0.2  | 0.1  | 16.8  | 13.6                  | 12.7  | 11.7 | 10.5  | 10.4 | 9.9   | 146.6 | 140.6                 | 138.8 | 136.9 | 133.8 | 134.3 | 132.8 |       |  |  |  |  |  |  |  |  |  |
|                     | 6       | 0.001      | 1.9  | 1.2                                                              | 0.9  | 0.5  | 0.2  | 0.1  | 0.1  | 49.0  | 47.9                  | 48.0  | 45.6 | 42.1  | 40.9 | 39.1  | 204.6 | 202.5                 | 199.7 | 198.7 | 194.5 | 191.6 | 189.4 |       |  |  |  |  |  |  |  |  |  |
|                     | 8       | 0.1        | 3.3  | 2.4                                                              | 1.8  | 1.1  | 0.5  | 0.4  | 0.3  | 8.9   | 6.0                   | 5.0   | 2.8  | 1.6   | 1.4  | 1.1   | 101.9 | 100.8                 | 98.0  | 90.8  | 92.3  | 91.0  | 91.9  |       |  |  |  |  |  |  |  |  |  |
|                     | 8       | 0.01       | 2.1  | 1.4                                                              | 1.0  | 0.5  | 0.2  | 0.2  | 0.1  | 14.8  | 13.9                  | 13.3  | 11.2 | 9.7   | 9.6  | 9.4   | 145.3 | 142.3                 | 140.0 | 136.1 | 132.0 | 132.2 | 131.8 |       |  |  |  |  |  |  |  |  |  |
|                     | 8       | 0.001      | 1.9  | 1.2                                                              | 0.9  | 0.5  | 0.2  | 0.1  | 0.1  | 47.7  | 47.3                  | 48.0  | 44.8 | 41.9  | 40.7 | 38.2  | 202.6 | 201.8                 | 201.3 | 199.2 | 193.9 | 191.9 | 188.8 |       |  |  |  |  |  |  |  |  |  |
