# Supplementary material for: Propensity score adjustment using machine learning classification algorithms to control selection bias in online surveys
Source: PubMed Central journal article supplement (PMC7176094; doi:10.1371/journal.pone.0231500), 2020-04-22
Supplement: pone.0231500.s009.pdf [file pone.0231500.s009.pdf]

S9 Table. Mean and median of bias (in absolute value) and MSE of estimates using PSA for each algorithm, and number of times its estimates have been among the best (absolute bias or MSE less than 1% greater than the minimum value)

| Estimated party | Algorithm     | Bias |        |       | MSE   |        |      |
|-----------------|---------------|------|--------|-------|-------|--------|------|
|                 |               | Mean | Median | Best  | Mean  | Median | Best |
| Party 1         | GLM           | 0.12 | 0.12   | 1     | 1.3   | 0.9    | 0    |
|                 | C4.5          | 0.17 | 0.18   | 2     | 1.2   | 0.7    | 4    |
|                 | C5.0          | 0.18 | 0.18   | 1     | 1.0   | 0.5    | 3    |
|                 | CART          | 0.18 | 0.18   | 0     | 0.7   | 0.5    | 11   |
|                 | k-NN          | 0.15 | 0.15   | 0     | 1.5   | 1.1    | 0    |
|                 | Naive Bayes   | 0.09 | 0.09   | 10    | 3.1   | 1.3    | 0    |
|                 | Random Forest | 0.21 | 0.18   | 6     | 11.7  | 10.5   | 0    |
| GBM             | 0.15          | 0.16 | 1      | 1.0   | 0.6   | 5      |      |
| Party 2         | GLM           | 0.6  | 0.6    | 0     | 3.7   | 2.4    | 12   |
|                 | C4.5          | 5.0  | 3.5    | 0     | 38.0  | 17.4   | 0    |
|                 | C5.0          | 5.5  | 4.4    | 0     | 42.8  | 28.3   | 0    |
|                 | CART          | 6.8  | 6.9    | 0     | 61.3  | 48.2   | 0    |
|                 | k-NN          | 0.4  | 0.4    | 9     | 4.5   | 3.2    | 1    |
|                 | Naive Bayes   | 2.2  | 1.4    | 0     | 16.5  | 6.9    | 0    |
|                 | Random Forest | 4.9  | 3.8    | 0     | 67.5  | 55.3   | 0    |
| GBM             | 3.5           | 2.6  | 13     | 26.6  | 9.3   | 10     |      |
| Party 3         | GLM           | 10.0 | 10.0   | 0     | 102.9 | 101.1  | 0    |
|                 | C4.5          | 12.6 | 11.7   | 0     | 166.9 | 139.9  | 0    |
|                 | C5.0          | 13.0 | 12.0   | 0     | 175.7 | 151.2  | 0    |
|                 | CART          | 13.9 | 14.2   | 0     | 201.3 | 202.7  | 0    |
|                 | k-NN          | 9.3  | 9.2    | 0     | 90.5  | 86.9   | 2    |
|                 | Naive Bayes   | 8.0  | 8.2    | 0     | 73.2  | 72.0   | 1    |
|                 | Random Forest | 6.0  | 6.5    | 21    | 75.3  | 68.0   | 19   |
| GBM             | 11.7          | 11.3 | 0      | 144.9 | 128.2 | 0      |      |
| Total           | GLM           | 3.6  | 0.6    | 1     | 36.0  | 3.5    | 12   |
|                 | C4.5          | 5.9  | 3.5    | 2     | 68.7  | 17.4   | 4    |
|                 | C5.0          | 6.2  | 4.4    | 1     | 73.2  | 28.3   | 3    |
|                 | CART          | 7.0  | 6.9    | 0     | 87.8  | 48.2   | 11   |
|                 | k-NN          | 3.3  | 0.4    | 9     | 32.1  | 3.9    | 3    |
|                 | Naive Bayes   | 3.4  | 1.4    | 10    | 30.9  | 10.4   | 1    |
|                 | Random Forest | 3.7  | 2.4    | 27    | 51.5  | 32.3   | 19   |
| GBM             | 5.1           | 2.6  | 14     | 57.5  | 9.3   | 15     |      |
