# Supplementary material for: Propensity score adjustment using machine learning classification algorithms to control selection bias in online surveys
Source: PubMed Central journal article supplement (PMC7176094; doi:10.1371/journal.pone.0231500), 2020-04-22
Supplement: pone.0231500.s010.pdf [file pone.0231500.s010.pdf]

S10 Table. Bias and MSE of bad self-reported health prevalence estimates after reweighting with PSA using classification algorithms.

|                      | Bias in % for each $n_{vs}$ |      |      |      |      | Mean Square Error for each $n_{vs}$ |       |       |       |       |
|----------------------|-----------------------------|------|------|------|------|-------------------------------------|-------|-------|-------|-------|
|                      | 500                         | 750  | 1000 | 2000 | 5000 | 500                                 | 750   | 1000  | 2000  | 5000  |
| <b>G1 covariates</b> |                             |      |      |      |      |                                     |       |       |       |       |
| Logistic regression  | -3.1                        | -3.1 | -3.1 | -3.1 | -3.0 | 10.9                                | 10.3  | 10.3  | 9.7   | 9.2   |
| CART                 | -3.7                        | -3.9 | -3.9 | -3.9 | -3.9 | 14.8                                | 15.6  | 15.3  | 15.1  | 14.9  |
| J48                  | -3.5                        | -3.6 | -3.4 | -3.8 | -3.9 | 13.7                                | 13.9  | 12.3  | 14.9  | 15.1  |
| C5.0                 | -3.5                        | -3.5 | -3.6 | -3.8 | -3.9 | 13.9                                | 13.1  | 13.9  | 14.9  | 15.0  |
| 11-NN                | -3.4                        | -3.4 | -3.2 | -3.3 | -3.3 | 13.1                                | 12.9  | 11.5  | 11.0  | 11.2  |
| Nave Bayes           | -3.0                        | -2.7 | -2.7 | -2.7 | -2.6 | 14.8                                | 34.0  | 28.4  | 16.4  | 10.3  |
| Random Forest        | -3.1                        | -3.0 | -3.2 | -3.3 | -3.4 | 19.0                                | 14.2  | 15.7  | 12.7  | 13.0  |
| GBM                  | -3.6                        | -3.6 | -3.6 | -3.6 | -3.6 | 14.1                                | 13.4  | 13.3  | 12.9  | 12.9  |
| <b>G2 covariates</b> |                             |      |      |      |      |                                     |       |       |       |       |
| Logistic regression  | -1.2                        | -1.3 | -1.2 | -1.2 | -1.1 | 3.7                                 | 3.5   | 2.8   | 2.4   | 1.9   |
| CART                 | -3.3                        | -3.8 | -3.8 | -3.9 | -3.9 | 12.5                                | 15.1  | 14.9  | 15.3  | 15.0  |
| J48                  | -2.5                        | -2.0 | -1.9 | -3.8 | -3.9 | 8.8                                 | 6.3   | 5.6   | 15.0  | 14.9  |
| C5.0                 | -2.7                        | -2.5 | -2.9 | -3.8 | -3.9 | 9.4                                 | 8.6   | 10.0  | 15.1  | 15.0  |
| 11-NN                | -1.8                        | -1.8 | -1.8 | -1.6 | -1.7 | 6.2                                 | 5.2   | 5.0   | 3.8   | 3.7   |
| Nave Bayes           | 1.0                         | -0.9 | -1.7 | -0.8 | -0.7 | 80.7                                | 38.2  | 32.2  | 38.9  | 40.8  |
| Random Forest        | -4.4                        | -4.1 | -3.9 | -3.1 | -1.5 | 20.8                                | 17.9  | 16.5  | 10.8  | 3.6   |
| GBM                  | -3.1                        | -3.1 | -3.0 | -3.1 | -3.0 | 10.9                                | 10.2  | 9.6   | 10.0  | 9.0   |
| <b>G3 covariates</b> |                             |      |      |      |      |                                     |       |       |       |       |
| Logistic regression  | -2.4                        | -2.4 | -2.4 | -2.4 | -2.2 | 8.7                                 | 7.2   | 6.9   | 6.1   | 5.3   |
| CART                 | -3.5                        | -3.9 | -3.8 | -3.8 | -3.9 | 13.5                                | 15.7  | 14.8  | 14.8  | 15.0  |
| J48                  | -3.0                        | -3.0 | -2.8 | -2.7 | -3.3 | 10.9                                | 10.4  | 9.2   | 8.3   | 11.2  |
| C5.0                 | -3.1                        | -3.2 | -3.2 | -3.5 | -3.9 | 11.3                                | 11.0  | 10.9  | 12.7  | 15.0  |
| 11-NN                | -3.2                        | -3.3 | -3.3 | -3.2 | -3.1 | 12.4                                | 12.3  | 12.0  | 10.8  | 9.7   |
| Nave Bayes           | -1.0                        | -1.0 | -0.7 | -0.9 | -1.1 | 18.4                                | 16.5  | 12.7  | 7.4   | 6.6   |
| Random Forest        | -3.5                        | -3.4 | -3.3 | -3.2 | -3.2 | 13.6                                | 12.6  | 12.1  | 10.8  | 10.6  |
| GBM                  | -3.5                        | -2.7 | -2.8 | -3.4 | -2.5 | 13.4                                | 8.8   | 8.8   | 11.7  | 6.4   |
| <b>G4 covariates</b> |                             |      |      |      |      |                                     |       |       |       |       |
| Logistic regression  | -2.0                        | -2.4 | -2.2 | -1.6 | -0.1 | 12.3                                | 13.3  | 12.4  | 16.6  | 24.1  |
| CART                 | -2.8                        | -3.9 | -3.9 | -3.9 | -3.8 | 9.8                                 | 15.6  | 15.3  | 15.2  | 14.9  |
| J48                  | -2.1                        | -2.3 | -2.3 | -2.2 | -2.7 | 7.6                                 | 7.0   | 7.2   | 6.3   | 8.2   |
| C5.0                 | -2.3                        | -2.8 | -2.6 | -3.0 | -3.8 | 7.5                                 | 9.2   | 8.3   | 10.2  | 14.7  |
| 11-NN                | -3.4                        | -3.3 | -3.2 | -3.1 | -2.9 | 13.4                                | 12.1  | 11.0  | 10.4  | 8.7   |
| Nave Bayes           | 11.1                        | 11.3 | 11.2 | 11.8 | 13.0 | 173.3                               | 164.0 | 156.0 | 158.8 | 188.1 |
| Random Forest        | -2.9                        | -2.9 | -2.7 | -2.3 | -2.1 | 10.2                                | 9.7   | 8.3   | 6.3   | 5.2   |
| GBM                  | -3.0                        | -2.9 | -2.9 | -2.9 | -1.2 | 10.1                                | 9.2   | 9.0   | 8.8   | 2.2   |
