# Supplementary material for: Propensity score adjustment using machine learning classification algorithms to control selection bias in online surveys
Source: PubMed Central journal article supplement (PMC7176094; doi:10.1371/journal.pone.0231500), 2020-04-22
Supplement: pone.0231500.s011.pdf [file pone.0231500.s011.pdf]

S11 Table. Bias and MSE of the estimates of the percentage of households with more than two members after reweighting with PSA using classification algorithms.

|                      | Bias in % for each $n_{vs}$ |      |      |      |      | Mean Square Error for each $n_{vs}$ |       |       |       |       |
|----------------------|-----------------------------|------|------|------|------|-------------------------------------|-------|-------|-------|-------|
|                      | 500                         | 750  | 1000 | 2000 | 5000 | 500                                 | 750   | 1000  | 2000  | 5000  |
| <b>G1 covariates</b> |                             |      |      |      |      |                                     |       |       |       |       |
| Logistic regression  | 10.3                        | 10.3 | 10.4 | 10.3 | 10.3 | 109.8                               | 108.5 | 110.4 | 107.9 | 107.5 |
| CART                 | 11.6                        | 11.4 | 11.4 | 11.4 | 11.5 | 138.0                               | 132.3 | 132.5 | 130.7 | 131.5 |
| J48                  | 10.5                        | 11.3 | 10.7 | 11.4 | 11.4 | 114.8                               | 130.1 | 117.2 | 131.4 | 130.1 |
| C5.0                 | 10.8                        | 11.0 | 11.2 | 11.4 | 11.4 | 120.9                               | 124.6 | 127.5 | 131.6 | 130.8 |
| 11-NN                | 10.8                        | 10.7 | 10.6 | 10.6 | 10.5 | 120.6                               | 118.2 | 115.2 | 113.3 | 110.7 |
| Nave Bayes           | 10.8                        | 10.9 | 10.9 | 10.6 | 10.6 | 136.3                               | 126.8 | 124.4 | 115.4 | 113.3 |
| Random Forest        | 12.4                        | 11.8 | 10.3 | 7.9  | 4.9  | 234.5                               | 200.3 | 148.1 | 80.7  | 39.7  |
| GBM                  | 11.0                        | 11.0 | 11.0 | 11.0 | 10.9 | 125.2                               | 123.3 | 123.4 | 120.9 | 120.0 |
| <b>G2 covariates</b> |                             |      |      |      |      |                                     |       |       |       |       |
| Logistic regression  | 10.1                        | 10.2 | 10.0 | 10.2 | 10.2 | 107.0                               | 107.0 | 103.3 | 105.6 | 104.5 |
| CART                 | 11.3                        | 11.5 | 11.4 | 11.3 | 11.4 | 131.6                               | 135.7 | 132.5 | 128.9 | 131.3 |
| J48                  | 10.5                        | 10.2 | 10.4 | 11.4 | 11.4 | 114.8                               | 108.6 | 111.2 | 130.6 | 131.2 |
| C5.0                 | 10.3                        | 10.7 | 11.1 | 11.5 | 11.4 | 111.9                               | 118.1 | 125.6 | 132.2 | 130.9 |
| 11-NN                | 10.4                        | 10.2 | 10.3 | 10.3 | 10.3 | 113.9                               | 107.9 | 108.4 | 108.1 | 106.1 |
| Nave Bayes           | 13.3                        | 14.1 | 14.9 | 14.3 | 14.6 | 343.9                               | 314.4 | 333.6 | 276.0 | 262.8 |
| Random Forest        | 12.8                        | 12.7 | 12.0 | 10.8 | 8.5  | 199.8                               | 173.7 | 154.8 | 121.8 | 77.1  |
| GBM                  | 10.9                        | 10.9 | 11.0 | 10.9 | 10.8 | 122.4                               | 121.8 | 122.0 | 119.3 | 117.5 |
| <b>G3 covariates</b> |                             |      |      |      |      |                                     |       |       |       |       |
| Logistic regression  | 8.2                         | 8.1  | 8.0  | 7.8  | 7.7  | 72.6                                | 70.2  | 66.6  | 63.0  | 60.8  |
| CART                 | 9.7                         | 11.5 | 11.5 | 11.4 | 11.4 | 99.4                                | 134.7 | 133.4 | 130.1 | 130.4 |
| J48                  | 8.3                         | 8.2  | 8.2  | 8.2  | 9.9  | 74.8                                | 71.7  | 71.0  | 69.0  | 101.1 |
| C5.0                 | 8.6                         | 8.7  | 8.6  | 10.0 | 11.4 | 79.4                                | 80.2  | 77.7  | 103.2 | 130.2 |
| 11-NN                | 8.8                         | 8.6  | 8.6  | 8.7  | 8.8  | 83.2                                | 79.2  | 77.7  | 78.0  | 79.0  |
| Nave Bayes           | 8.1                         | 7.7  | 7.8  | 7.3  | 7.2  | 90.8                                | 85.8  | 79.4  | 73.9  | 99.0  |
| Random Forest        | 10.8                        | 10.5 | 10.4 | 10.1 | 9.6  | 122.3                               | 114.5 | 112.1 | 104.2 | 95.0  |
| GBM                  | 10.4                        | 8.8  | 8.7  | 9.9  | 7.8  | 112.0                               | 81.2  | 79.5  | 99.9  | 62.9  |
| <b>G4 covariates</b> |                             |      |      |      |      |                                     |       |       |       |       |
| Logistic regression  | 8.5                         | 8.6  | 8.6  | 7.8  | 4.9  | 93.2                                | 97.8  | 100.9 | 102.1 | 84.4  |
| CART                 | 9.3                         | 11.3 | 11.3 | 11.4 | 11.4 | 92.6                                | 129.9 | 128.9 | 131.0 | 131.2 |
| J48                  | 7.5                         | 7.7  | 7.8  | 7.4  | 8.6  | 64.1                                | 63.9  | 64.8  | 58.0  | 77.7  |
| C5.0                 | 7.5                         | 8.5  | 8.3  | 9.4  | 11.4 | 63.1                                | 77.2  | 73.3  | 92.9  | 130.1 |
| 11-NN                | 8.2                         | 8.3  | 8.2  | 8.2  | 8.1  | 74.8                                | 73.6  | 70.2  | 69.1  | 67.5  |
| Nave Bayes           | -4.8                        | -5.0 | -5.5 | -5.6 | -5.0 | 76.1                                | 67.4  | 68.9  | 57.3  | 48.3  |
| Random Forest        | 9.8                         | 9.6  | 9.5  | 8.9  | 8.3  | 101.7                               | 95.7  | 92.3  | 81.5  | 72.3  |
| GBM                  | 9.8                         | 9.8  | 9.7  | 9.6  | 6.8  | 100.5                               | 99.3  | 96.0  | 94.1  | 48.3  |
